# Supplementary material
Source: PubMed Central journal article supplement (PMC5651764)
Supplement: pnas.1708574114.sapp.pdf [file pnas.1708574114.sapp.pdf]

# Supporting Information

## High-intensity urban light installation dramatically alters nocturnal bird migration

Benjamin M. Van Doren, Kyle G. Horton, Adriaan M. Dokter, Holger Klinck, Susan B. Elbin, and Andrew Farnsworth

### SI Methods

**Study Site.** Tribute in Light consists of two ground-based installations of lights, each comprising 44 7,000-8,000-watt xenon bulbs pointing skyward, giving the appearance of two tall towers of light. The bulbs have a dichroic treatment as well as nickel rhodium reflectors that significantly reduce infrared and ultraviolet spectra and create an effect similar to daylight. Beam projection and visibility is highly dependent on weather conditions, but the columns of light can project vertically from thousands of meters to tens of kilometers and are visible from distances up to 100 km.

At the time that the agreement for shutting down the installation in the presence of birds was developed, there was no information available about the dynamics of how birds arrive and depart the tribute site, nor was there information about how the installation affected behaviors. The shutdown process takes several minutes to complete because each bulb of the two 44-bulb installations must be turned off individually. Once dark, lights remained off for  $22 \pm 6$  SD minutes. A dark period of approximately 20 minutes represented the best consensus among all stakeholders to balance potentially conflicting interests to maintain the integrity and intent of the event and to remove the attractive stimulus to birds, allowing them to depart from the area of potential hazard.

**Weather Data.** Weather data included details of temperature, visibility, wind direction and speed, and general conditions (Table S3) as well as more detailed cloud ceiling and cover aloft (Table S4). Clear skies prevailed among the 77 hourly LCD observations, with 66 of 77 hours (85.7%) exhibiting conditions described as clear or mostly clear skies. Local visibility never dropped below 11 km on any of our monitoring nights, and visibility of 16 km or greater occurred in 66 of 77 samples (87.5%). Visibility was at maximum (18.5 km) for 71 of 77 hours, with the remaining six hours never dropping below 13.0 km. Additionally, cloud cover was less than 50% for all but eight hours, generally 12.5% or less, and never below 0.5 km above the ground, mostly 0.5-1.5 km above the ground (Table S4). Thus, we did not classify any of these nights as poor visibility conditions.

**Weather Surveillance Radar.** In addition to the methods presented in the main text, a number of methodologies were important for our calculations of metrics describing the influence of the installation. To quantify the total number of birds affected by the installation, we estimated the number of birds within 5 km of the installation up to a height of 4.5 km using data from the  $0.5^\circ$  elevation angle and applying the correction factors described in the main text (Fig. S10). We did this for all radar scans across all years. The correction factors allowed us to estimate the total number of birds present from altitudes of 0-4.5 km given the number of birds detected in the  $0.5^\circ$  sweep. For comparison, we calculated the average bird density between 10-20 km from the installation and found the expected number of birds within 5 km of the installation, assuming densities were the same as those 10-20 km away. The difference between the expected number and the directly measured number was our estimate of the number of birds influenced by the installation in that radar scan. When the density of birds near the installation was lower than baseline, we set the number of birds affected to zero for that scan. Because our simulations (see below) provide information on the actual turnover time, we arrived at a total estimate that avoids double-counting birds by subsampling our dataset by a factor equal to the median time between radar scans (9.5 minutes) divided by the stabilization time estimate. For example, if the average turnover time is 20 minutes and the median time between radar scans is 10 minutes, we would subsample by a factor of  $10/20 = 0.5$ , summing on average every other radar scan. To quantify uncertainty in our estimate, we calculated 95% confidence intervals by subsampling 10,000 times and finding the 0.025 and 0.975 quantiles of the resulting values.

We also analyzed data from the radar sweep with an elevation angle of  $\approx 1.5^\circ$ . This sweep intersects the airspace above the installation at an altitude of approximately 3.2 km (50% power range 2.4-4.1 km), twice as high as the  $0.5^\circ$  sweep. These altitudes are at the upper limit of bird migration, particularly passerines, in this region (e.g. 1, 2). Using the approach described in the main text, we calculated the number of birds in a cylinder of radius 0.5 km along the ground and height 1.7 km. We did not apply an additional multiplier.

To construct standardized visuals (e.g. Fig. 1B,C; Movies S2, S3) of the area of influence during periods of illumination, we cast radar resolution cells of the 0.5° elevation sweep to a regular spatial grid (i.e. raster image,  $\approx 0.002^\circ \times 0.002^\circ$ ) using an equidistant cylindrical projection. We used maximum values of reflectivity and those nearest the radar for radial velocity when two or more resolution cells occupied a cell. We used the mean value in each cell for periods with and without illumination for aggregate plotting.

**Acoustic Analysis.** Because of the high intensity of calling activity at the site, in which many calls overlapped in time and frequency, and to minimize effects of different microphones, we used the amplitude in the 6-9 kHz frequency band to derive an index of calling activity. We applied a 10<sup>th</sup>-order Butterworth band-pass filter with corner frequencies 6 kHz and 9 kHz to the dataset (see Fig. S6). We then calculated mean amplitude values for the 6-9 kHz frequency band for consecutive one-minute non-overlapping windows. Finally, we normalized the resulting time series to obtain a relative calling activity index, hereafter “normalized amplitude.” A normalized amplitude of 1 represents the maximum observed calling activity.

To estimate numbers of calls from normalized amplitude, we manually counted flight calls from spectrograms (Hann Window, FFT size 512, overlap 87.5%, 375 Hz grid spacing; (3)) in 40 one-minute periods during the night of 11 September 2015. We randomly selected these periods during the night, while ensuring that there was equal representation from each quartile of the normalized amplitude distribution. Normalized amplitude was an excellent predictor of vocal activity ( $R^2 = 0.90$ ,  $P < 0.0001$ ; Fig. S11), demonstrating that it is an appropriate measure of vocal activity from flight calls. In this linear model, we forced the regression through the origin to avoid the impossible scenario of negative flight calls (i.e. there should be zero normalized amplitude when there are zero calls, but this assumes no interfering noises, which was not always the case).

In order to directly compare acoustic and radar observations with linear models, we downsampled acoustic observations to the frequency with which radar observations were gathered. We achieved this by simply selecting the nearest one-minute calling sample for each radar observation, provided that it occurred within three minutes of the radar observation.

**Visual Observations.** Visual observations represented, to the best of observers’ abilities, estimates of numbers, species, and flight behaviors of birds. AF used Zeiss and

Kowa optics (10 x 50 binoculars and 20-60 zoom x 85 spotting scope, respectively, in 2008, 2010, and 2012-2015) and Swarovski optics (12 x 50 binoculars and 30-70 x 95 spotting scope in 2016). These observations are archived as specified in the Methods. See Movie S1.

Hypothetically, decreases in average radial velocities observed by radar for nocturnally migrating birds during periods of illumination could mean either that birds’ mean flight speeds slowed as they passed the installation, or that individual birds maintained flight speeds but, because many birds started circling, appeared to decrease in average speed relative to the radar station. We used visual observations to determine which of these scenarios was occurring.

**Statistical Analyses.** We used generalized additive models (R package *mgcv* (4)) to quantify the effects of illumination on birds’ behaviors. We tested the categorical factors of light (on/off) and year on four metrics: standardized peak density; the total number of birds present within 0.5 km of the installation; the radial velocities of birds above the installation; and the number of flight calls recorded beneath the site. We looked separately at 0.5° and 1.5° radar sweeps. Because the light shutdown procedures took several minutes to complete, and to allow birds time to respond to the change of treatment, we excluded data points within 5 minutes of an on/off transition. In addition to the categorical factors listed above, we included two smooth terms (thin plate regression splines with basis dimension chosen automatically): 1) time of night and 2) mean bird density between 2-20 km away, fitted separately for each year. These terms accounted for any overall variation in densities and behavior through each night unrelated to local light pollution (e.g. due to weather factors and regular circadian patterns; see (5-7)) and additionally served to account for autocorrelation. Importantly, in our model of vocal activity, we also included the peak bird density above the installation (as measured by radar) as a continuous predictor to account for variation in calling explained simply by the number of birds present. For each metric, we compared models with three possible combinations of categorical factors: light alone; light and year; and light and year with an interaction. We evaluated these models with the Akaike Information Criterion (AIC) and selected the model with the lowest AIC score. However, if the model with the lowest AIC score was within 1 AIC unit of a model with fewer parameters, we used the more parsimonious model. We checked the distribution of model residuals and applied data transformations when necessary. Initially, the residuals for the models of standardized peak density, total number of birds, and number of flights calls were

highly skewed, and it was necessary to apply a log transformation to these response variables. We used the *logst* transformation in the R package *regr0* (8), which is equivalent to a  $\log_{10}$  transformation for all but the smallest values, which are scaled such that the transformation yields all finite values. We chose this option because, unlike adding an arbitrary constant value to all observations, this method of scaling small values is determined by the distribution of the data. It only modifies the smallest observations, leaving all others unchanged. For models with log-transformed response variables, we express effect size as a multiplicative factor, found by exponentiating the coefficient.

In addition to testing for average differences in bird numbers between light and dark periods over the entire night, we looked at changes in peak concentrations between periods. We compared measurements made during periods of darkness (up to 30 minutes in duration) to those made during adjacent 30-minute illuminated periods. In each period, we found the maximum values of standardized peak density and total number of birds for both  $0.5^\circ$  and  $1.5^\circ$  sweeps. We constructed linear models as above, but without smooth terms because autocorrelation was not an issue. Again, we tested for the best of three possible models using AIC. We log-transformed response variables to satisfy model assumptions.

Figures were produced using the R packages *lattice* (9), *Hmisc* (10), *ggplot2* (11), and *cowplot* (12).

**Simulations.** We defined our simulations with the following assumptions. A bird in the migratory state could fly undisturbed in an average preferred migratory direction. Birds enter the disoriented state following a normal probability distribution  $f$  (see Fig. S8A) that decreases with distance ( $d$ ) from the light.

$$f(d | a, \sigma) = ae^{-\frac{d^2}{2\sigma^2}} \quad (1)$$

Here,  $a$  is the model parameter specifying the maximum probability to disorient when a bird is within (or very near) the lights. The standard deviation ( $\sigma$ ) specifies the characteristic distance from the light at which birds become disoriented. In the disoriented state, birds depart from their preferred migratory direction and draw their flight direction from circular normal distribution  $g$  (von Mises distribution, see Fig. S8B):

$$g(\alpha | \alpha_{\text{light}}, \kappa) = \frac{e^{\kappa \cos(\alpha - \alpha_{\text{light}})}}{2\pi I_0(\kappa)} \quad (2)$$

with  $\alpha_{\text{light}}$  the angular direction of the lights at the position of the bird,  $I_0$  the modified Bessel function of

order 0, and  $\kappa$  the concentration parameter. When  $\kappa = 0$  the function  $g$  is uniform, and birds' flight paths follow a random walk. When  $\kappa > 0$  there is a preferential flight direction towards the lights, with larger  $\kappa$  implying a more directed flight towards the light source.

The simulation model thus has three main parameters

- $a$ , the probability of disorientation
- $\kappa$ , the concentration parameter for disoriented flight, determining the extent to which birds fly towards ALAN when disoriented
- $\sigma$ , the characteristic distance from the lights within which ALAN affects bird behaviors

The simulation grid had a 5 x 5 km extent, with grid cells of 50 x 50 m. The simulation time step  $\Delta t = 10$  s. In each simulation step, we determined the proportion of birds in that cell affected by ALAN using Equation (1). We propagated these disoriented birds over a distance  $\Delta t v_{\text{bird}}$  into directions given by the angular distribution of Equation (2). We propagated the remaining birds in the migratory state over an equal distance into the preferred migratory direction.

Model parameters were fit to the radar observations in years 2010, 2012, 2013, 2015 and 2016, when lights were manipulated. Simulations were performed on the basis of lights-on periods, in which we assumed the baseline migration density and speed to be constant. The baseline migration ground speed  $v_{\text{bird}}$  was calculated at the location of KOKX, using a vertical profile extraction following the methods of (13). The baseline migration density was calculated as the average bird density in the area 2-20 km distance from the installation, assuming a cross-section per bird of  $8.1 \text{ cm}^2$ . The peak density at the installation for each radar scan was calculated as the maximum density observed within 500 m of the installation. The frame of reference is rotated such that the birds' migratory directions were upward towards the lights, located in the center of the simulation grid. We excluded the first lights-on period after sunset, as bird densities change rapidly in this time window, and to not be affected by potentially different behavior during takeoff or when it is not fully dark. This gave 20 lights-on periods in total for the 5 years.

The model was fit by an exhaustive search in the model parameter space, considering  $a=0.25-0.98$  (steps of 0.1),  $\kappa=0-0.8$  (steps of 0.1), and  $\sigma=250-2000$  m (steps of 250 m). All possible combinations of parameter values were tested in separate model runs coded in Wolfram Mathematica 11, requiring  $\approx 12$  days of CPU time on a

2.3 GHz Intel Core i5 processor. Goodness-of-fit of the simulation was quantified by the explained variance in peak density at the ALAN source, defined as  $1 - S_{\text{err}}/S_{\text{tot}}$ , with  $S_{\text{err}}$  the sum of squared residuals between simulated and measured peak density, and  $S_{\text{tot}}$  the sum of squares of measured peak density. Explained variance for all parameterizations is reported in Table S2.

We visualized simulation runs for a high ( $a = 0.95$ ) and a low ( $a = 0.5$ ) disorientation probability, as well as for moderately strong ( $\kappa = 0.2$ ) and weak ( $\kappa = 0.1$ ) attraction to light (see Fig. 4). Parameterizations are illustrated in Fig. S8. We extracted from the runs the bird density increase factor at the ALAN source and a stabilization time, defined as the time required to reach 95% of the steady state peak density at the ALAN source.

1. La Sorte FA, *et al.* (2015) Seasonal changes in the altitudinal distribution of nocturnally migrating birds during autumn migration. *Royal Society Open Science* 2(12):150347.
2. Bellrose FC (1971) The distribution of nocturnal migrants in the air space. *The Auk* 88(2):397-424.
3. Bioacoustics Research Program (2011) *Raven Pro: interactive sound analysis software. Version 1.4* (The Cornell Lab of Ornithology, Ithaca, New York, USA).
4. Wood SN (2011) Fast stable restricted maximum likelihood and marginal likelihood estimation of semiparametric generalized linear models. *Journal of the Royal Statistical Society: Series B (Statistical Methodology)* 73(1):3-36.
5. Farnsworth A, *et al.* (2016) A characterization of autumn nocturnal migration detected by weather surveillance radars in the northeastern USA. *Ecol. Appl.* 26(3):752-770.
6. Van Doren BM, Horton KG, Stepanian PM, Mizrahi DS, & Farnsworth A (2016) Wind drift explains the reoriented morning flights of songbirds. *Behavioral Ecology* 27(4):1122-1131.
7. Van Doren BM, Sheldon D, Geevarghese J, Hochachka WM, & Farnsworth A (2015) Autumn morning flights of migrant songbirds in the northeastern United States are linked to nocturnal migration and winds aloft. *The Auk* 132(1):105-118.
8. Stahel W (2017) *regr0: Building regression models.* R Package version 1.0-5/r80.
9. Sarkar D (2008) *Lattice: Multivariate Data Visualization with R* (Springer, New York).
10. Harrell Jr. FE (2017) *Hmisc: Harrell Miscellaneous.* R package version 4.0-3.
11. Wickham H (2009) *ggplot2: Elegant Graphics for Data Analysis* (Springer-Verlag, New York).
12. Wilke CO (2017) *cowplot: Streamlined Plot Theme and Plot Annotations for 'ggplot2'.* R package version 0.8.0.
13. Horton KG, Van Doren BM, Stepanian PM, Farnsworth A, & Kelly JF (2016) Seasonal differences in landbird migration strategies. *The Auk* 133(4):761-769.

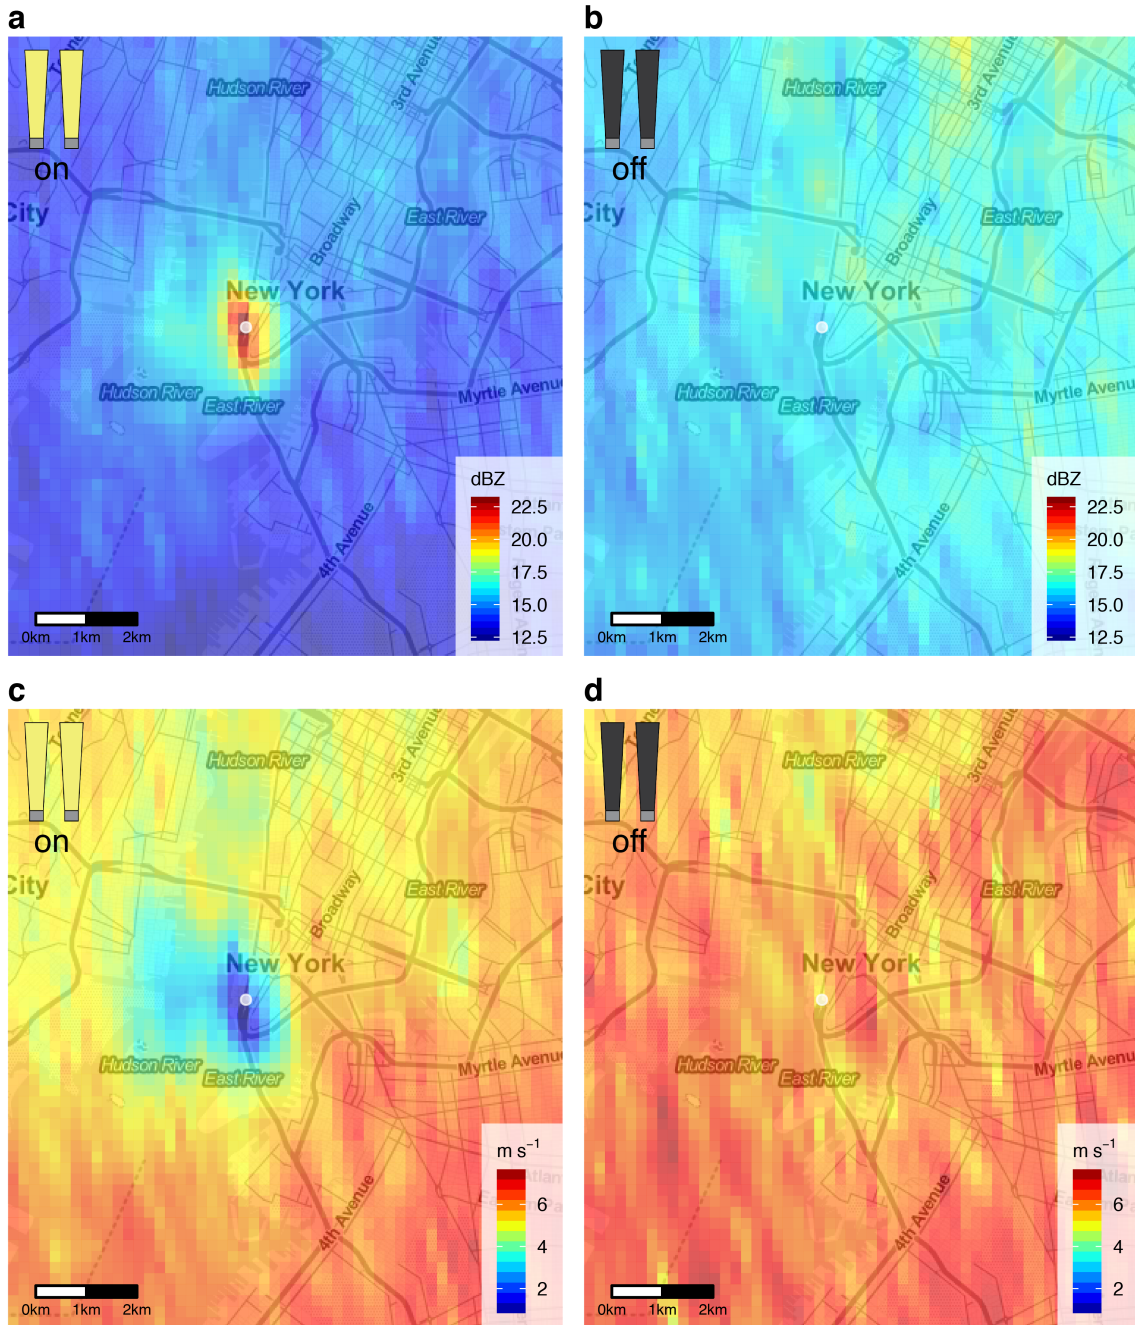

**Fig. S1. Area of ALAN influence on nocturnally migrating birds at Tribute in Light, 11-12 September 2015.** Bird density close to the installation (white dot) with illumination **a** was noticeably higher than in the surrounding area and without illumination **b**; radial velocity with illumination **c** was noticeably lower than in the surrounding area and without illumination **d**. Each cell shows the mean value for illuminated (**a**, **c**) and dark periods (**b**, **d**).

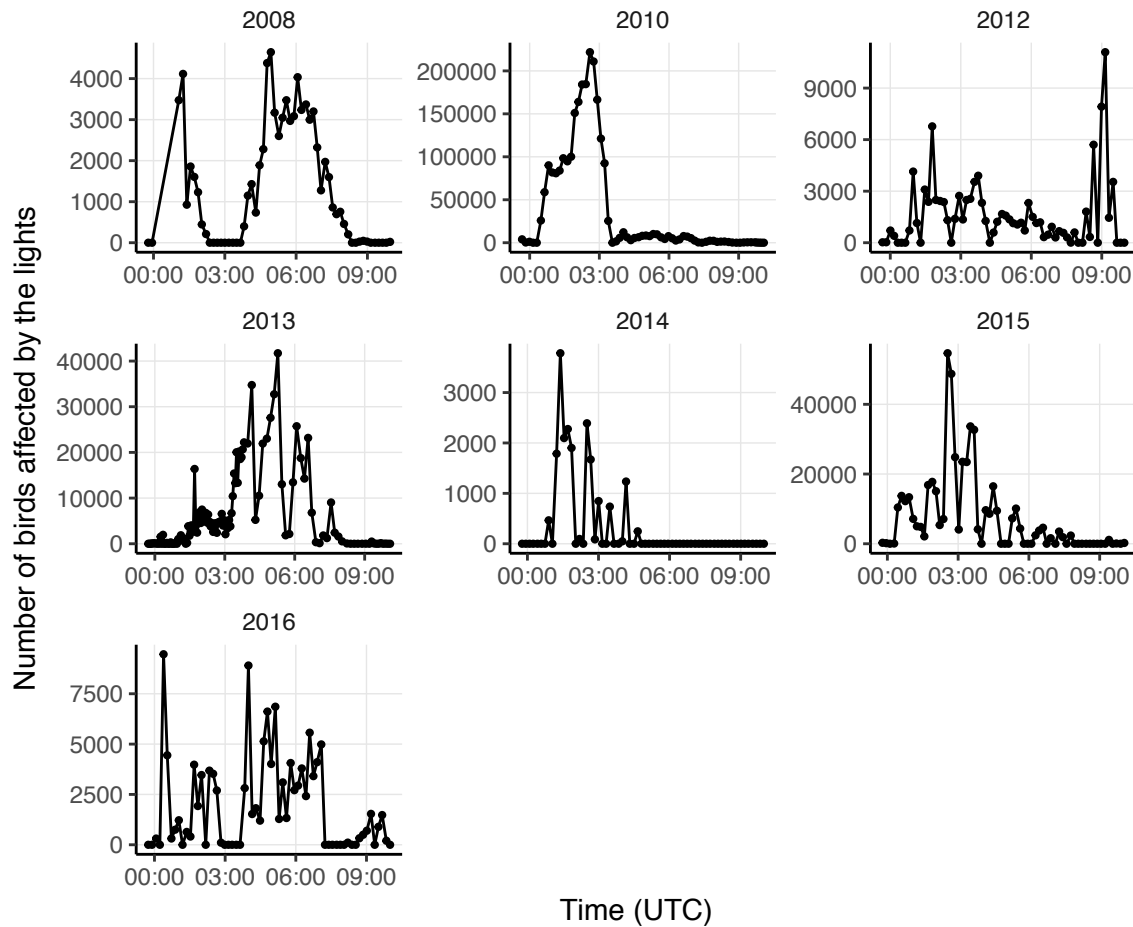

**Fig. S2. Numbers of birds affected by Tribute in Light by year.** Presented are differences between bird numbers within 5 km of the installation and the number expected in that area given baseline densities from 10-20 km away (Fig. S3). To arrive at an estimate of a total of 1.1 million birds (95% CI: 0.6-1.6 million) affected during the study, we divided the median time between radar scans of 9.5 minutes by the simulated stabilization time of 34 minutes (Fig. 4) and summed this proportion ( $\approx 0.28$ ) of the dataset.

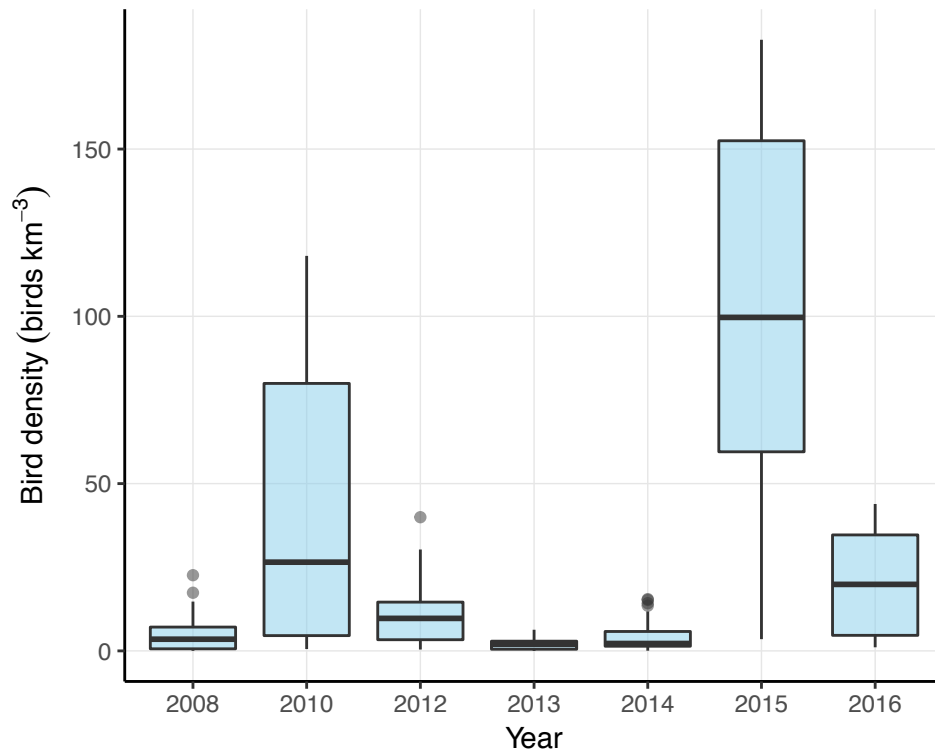

**Fig. S3. Baseline bird density around Tribute in Light by year.** Bird densities between 10-20 km from the installation as detected by the 0.5° elevation angle radar beam.

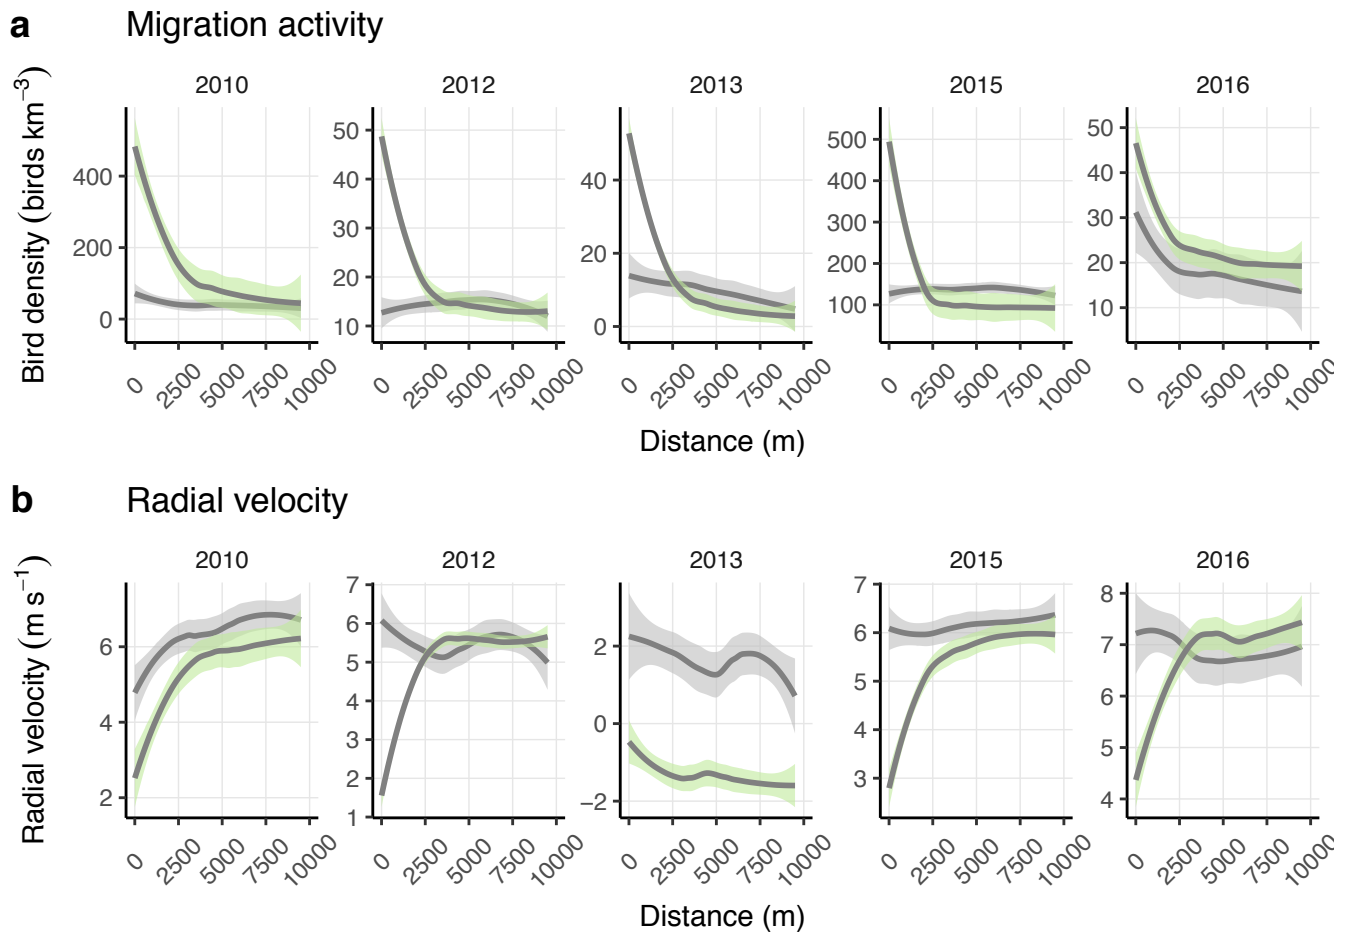

**Fig. S4. Bird migration behavior by distance from Tribute in Light by year.** Radar-measured bird density and radial velocity with increasing distance from the installation, with (green shading) and without (gray shading) illumination. Curves are local polynomial regression surfaces (*loess* function). Included are the five years during which light shutdowns occurred.



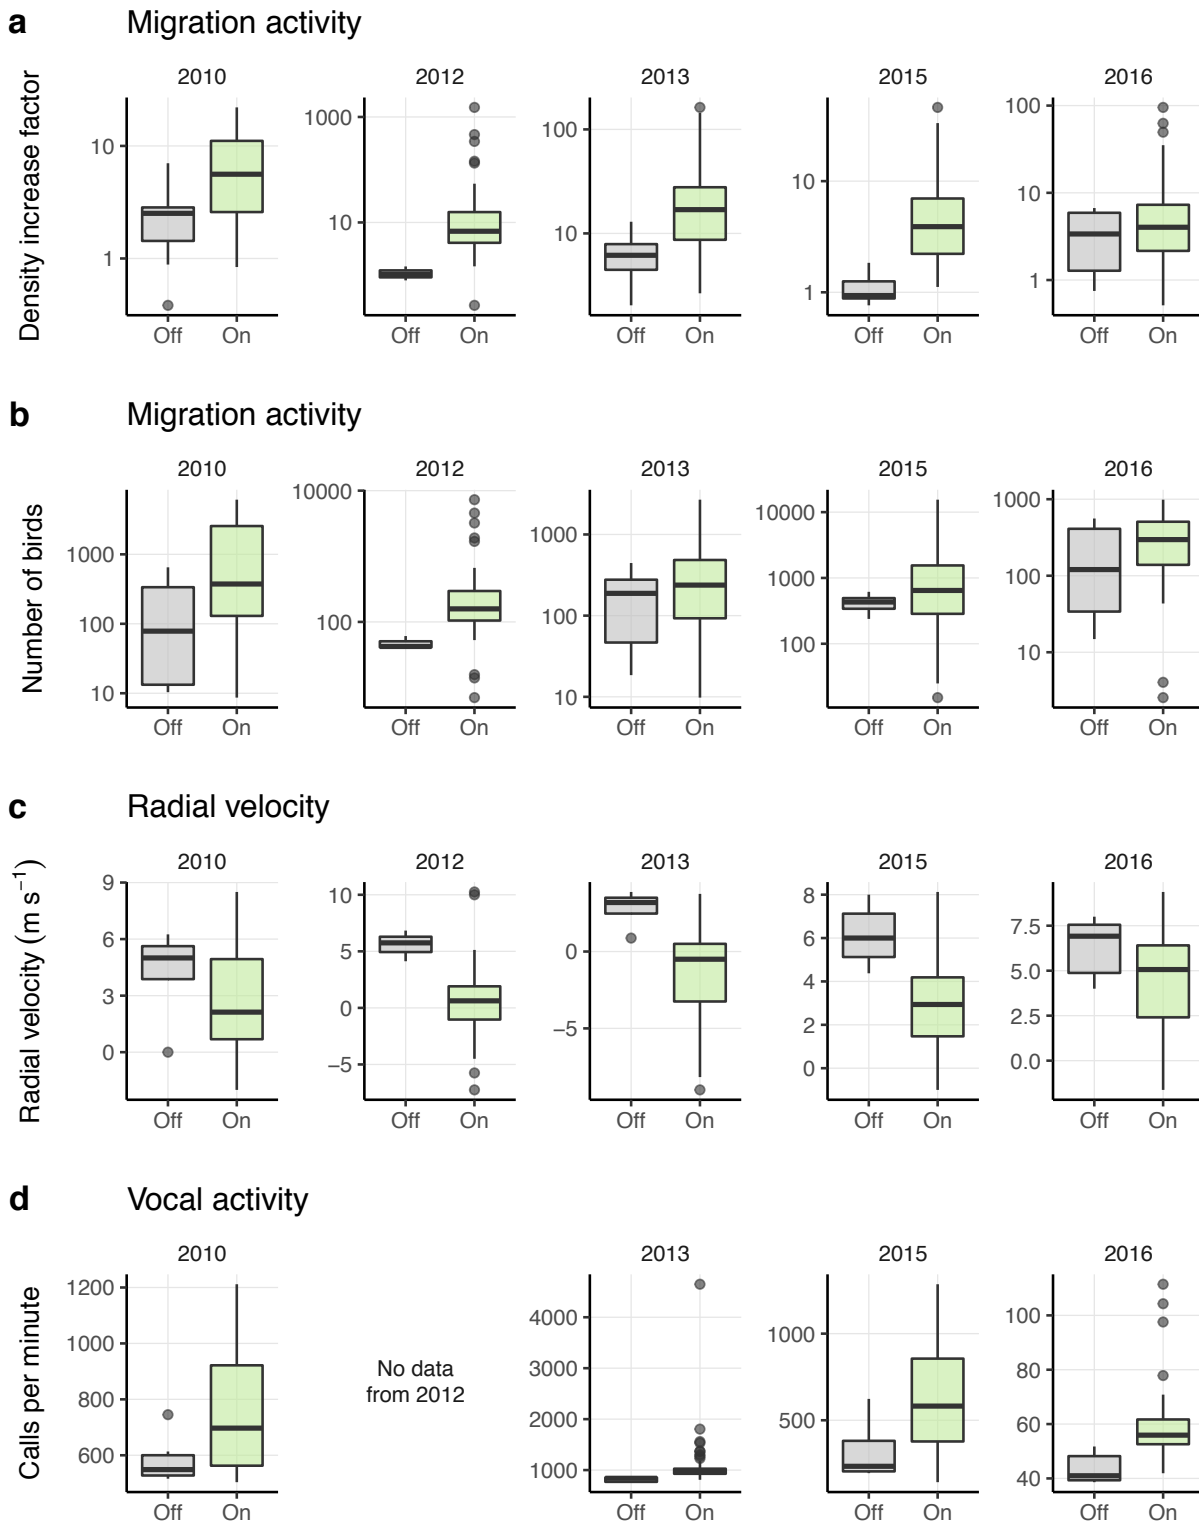

**Fig. S5. Boxplots showing four behavioral metrics with and without illumination by year.** (a) Density increase factor, defined as peak bird density within 500 m of the installation divided by mean bird density between 2-20 km from the site. Data points calculated from very low bird densities (baseline less than  $0.1 \text{ birds km}^{-3}$ ) are not shown. (b) Estimated number of birds in the cylinder with radius 500 m and height 4.5 km, directly above the site. (c) Radial velocity 0-500 m from the site. (d) Number of flight calls per minute detected beneath the installation. Included are the five years during which light shutdowns occurred.

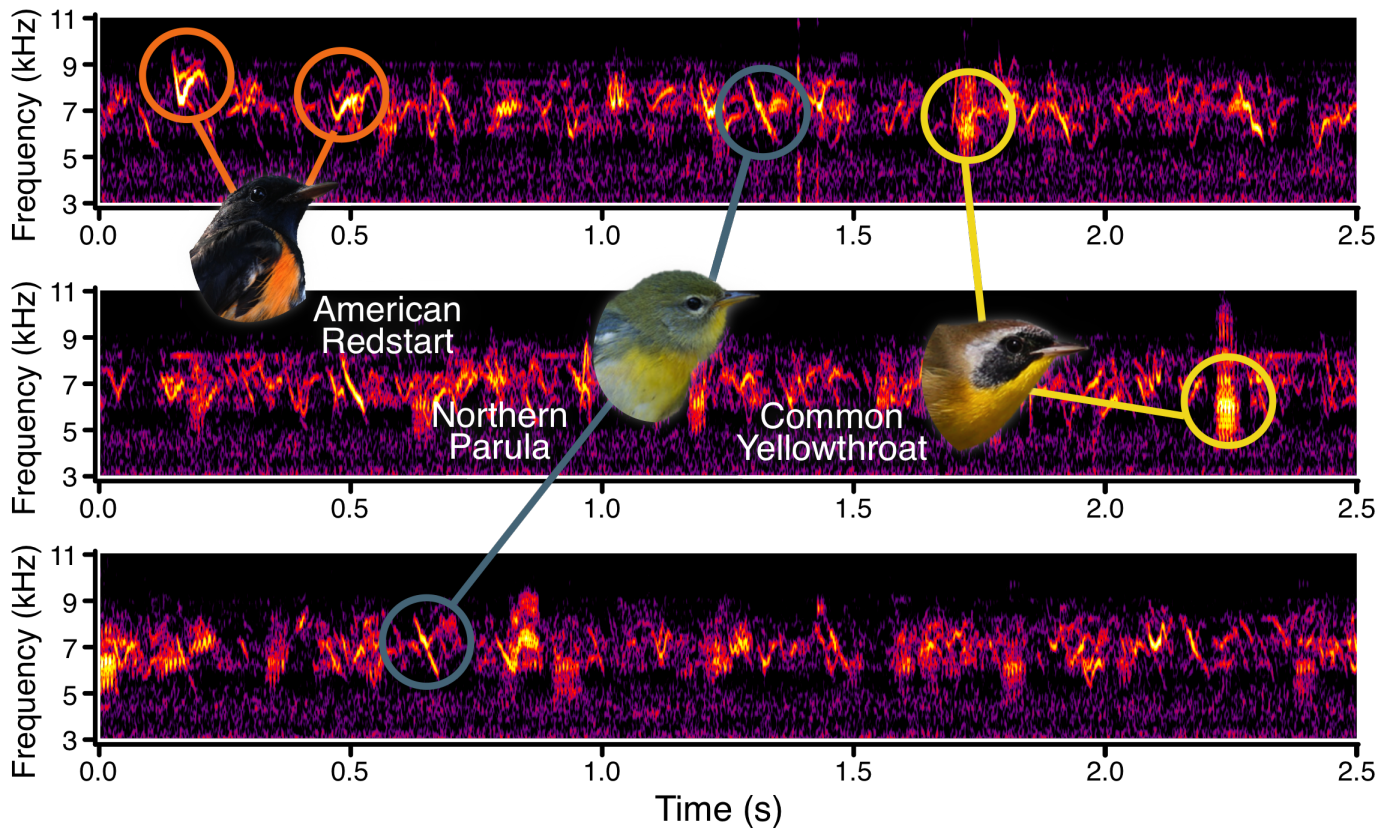

**Fig. S6. Vocal activity of nocturnally migrating birds above Tribute in Light.** Spectrographic representation of vocal activity in a 7.5-second audio sample from 12 September 2015, 0549 UTC (Coordinated Universal Time). Areas of brighter colors, such as reds, oranges, and yellows, have higher amplitude (i.e. are louder) than areas of purple or black. Note the large numbers of flight calls in the 6-9 kHz frequency range of this recording from an illuminated period at the installation, including many calls that overlap in frequency and time; we applied a band-pass filter to quantify acoustic energy within this frequency range. Among the diversity of species represented in this sample, circles highlight the calls of three species of American wood-warblers (family Parulidae) that were numerous at the study site: American Redstart, *Setophaga ruticilla* (orange), Northern Parula, *Setophaga americana* (blue), and Common Yellowthroat, *Geothlypis trichas* (yellow). Photos: American Redstart, Kyle Horton; Northern Parula, Ian Davies/Macaulay Library, eBird S24916843; Common Yellowthroat, William Keim/Macaulay Library, eBird S31689615.

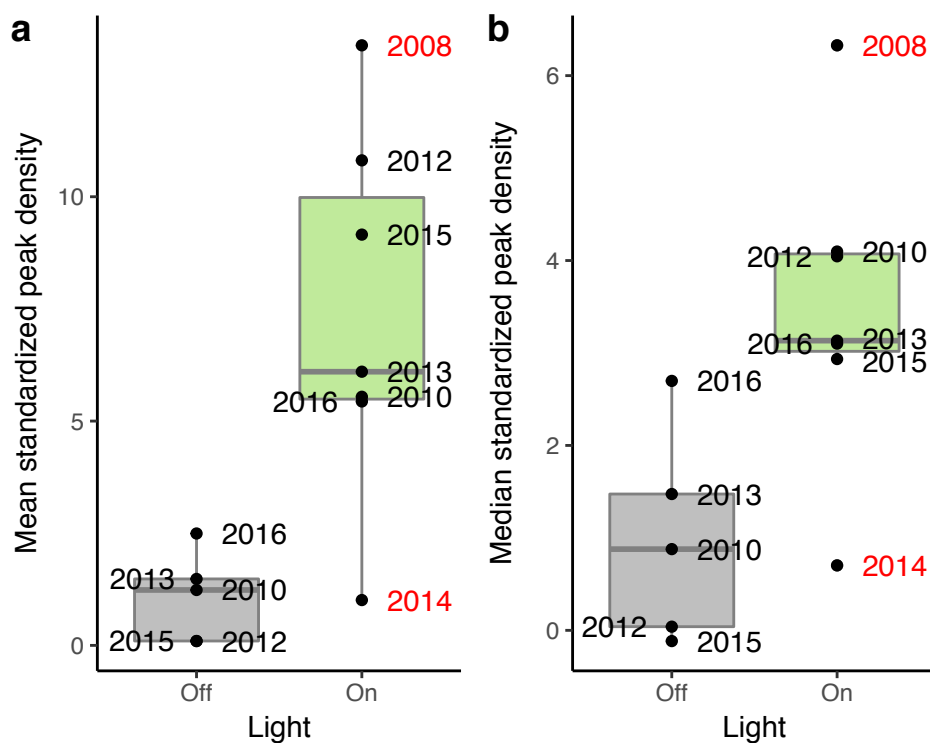

**Fig. S7.** (a) Mean and (b) median values of standardized peak density at Tribute in Light for 2008-2016 by illumination, excluding 2009 and 2011 due to the presence of precipitation. Lights were not turned off in 2008 or 2014 (shown in red), and therefore these years were excluded from core analyses. Note that 2008 showed an above-average concentration effect, while 2014 showed a below-average concentration effect. In other words, the five years included in the core analyses fell comfortably between the two years that were not included because no shutdowns occurred. Therefore, based on the available data, we conclude that the five primary study years are representative of typical light effects at the installation.

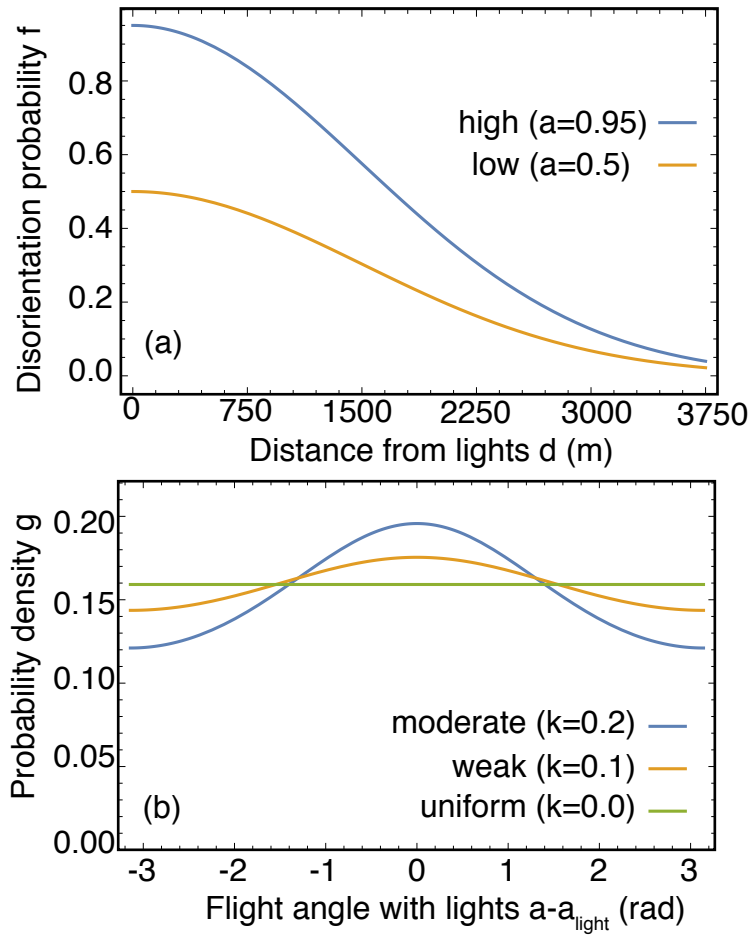

**Fig. S8. Model simulation of disorientation.** In the simulation, birds could transition between an undisturbed migratory state and a disoriented state. (a) Parameterizations of the distance-dependent disorientation probability  $f$  (Equation 1).  $a$  is the probability of disorientation. (b) Parameterizations of the angular Von Mises distribution  $g$  (Equation 2) for the case of uniform ( $\kappa = 0$ ), moderate ( $\kappa = 0.2$ ) and weak ( $\kappa = 0.1$ ) directed flight towards ALAN for birds in the disoriented state.  $\kappa$  is the concentration parameter for disoriented flight, determining the extent to which birds fly towards ALAN when disoriented. When  $\kappa = 0$ , birds' flight paths follow a random walk; when  $\kappa > 0$ , birds fly toward the lights, with larger  $\kappa$  implying a more directed flight towards the light source.

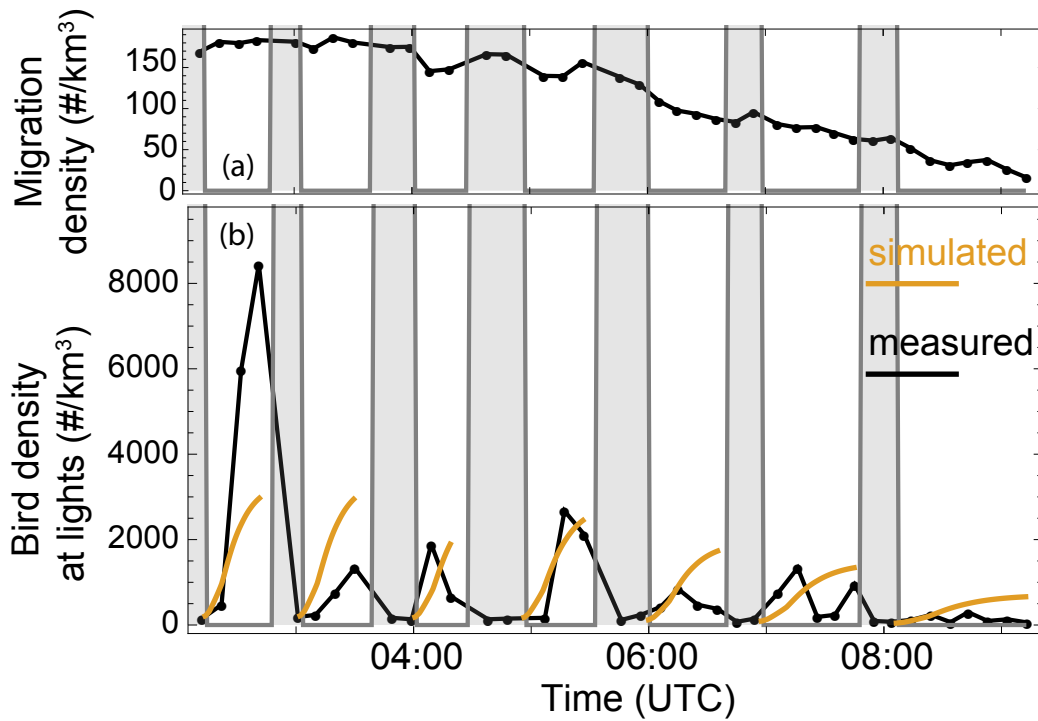

**Fig. S9. Simulated and measured regional and local migration on 11-12 September 2015.** (a) Background migration density (birds km<sup>-3</sup>) in regions not affected by ALAN. This density is the mean migration density between 2-20 km from Tribute in Light. (b) Bird density at the installation as recorded with the KOKX radar in 2015. Shaded areas indicate periods when lights were off. This density is peak density observed within 500 m of the installation. Simulated densities during light-on periods are given in orange, using the parameterization of the best model fit (model 1).

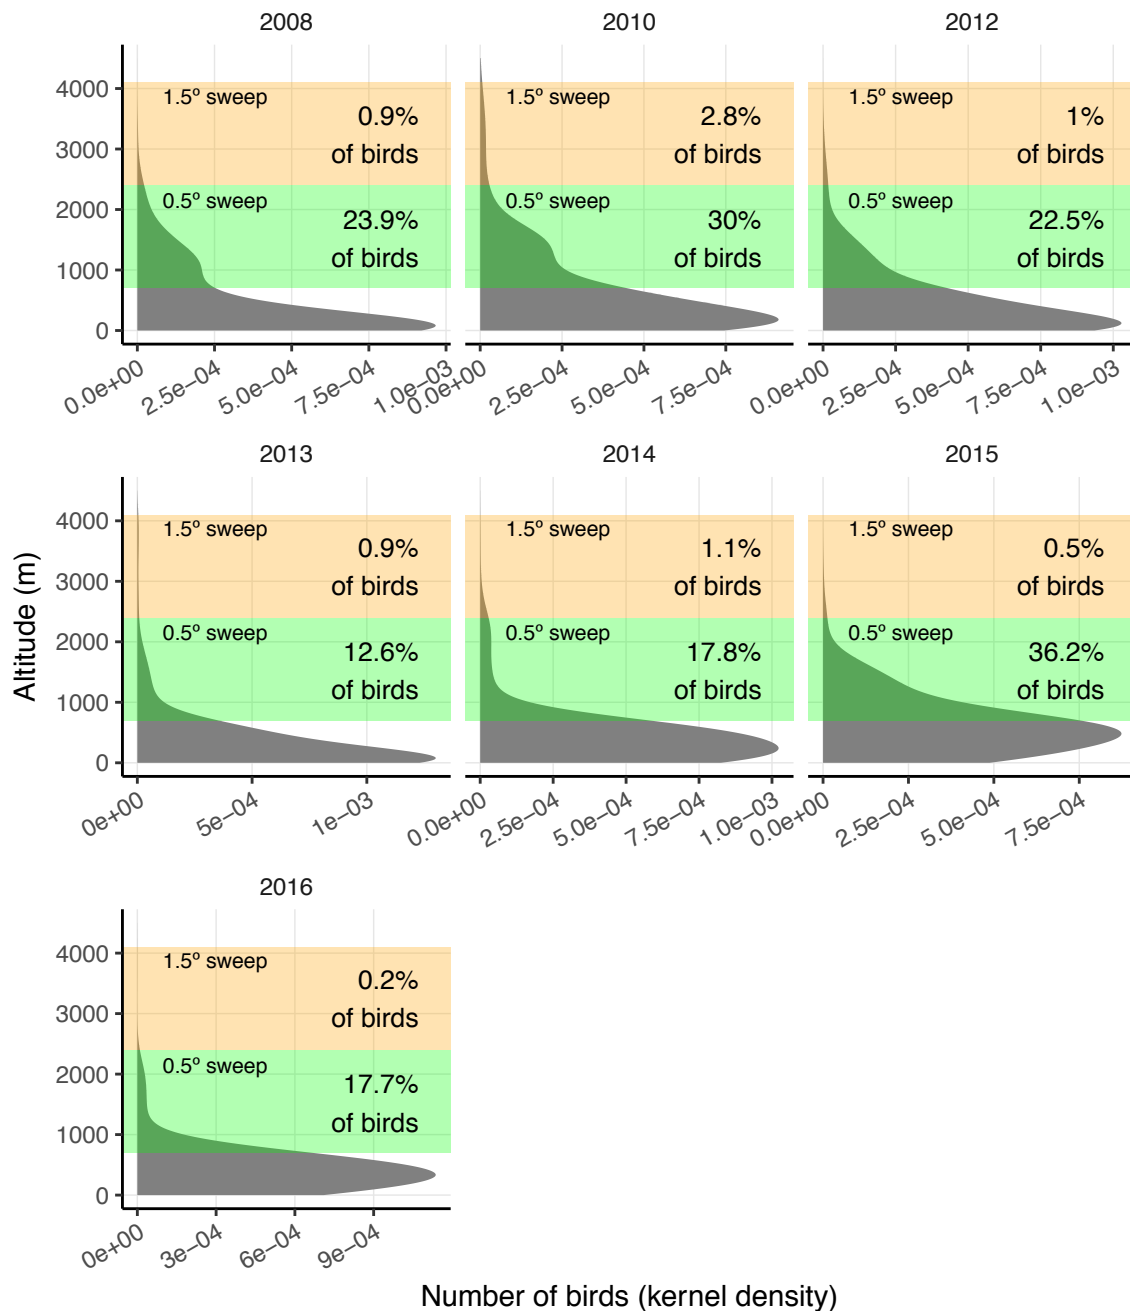

**Fig. S10. Proportion of nocturnal bird migration by altitude and radar sweep coverage by year at Tribute in Light.** Vertical profiles of bird density constructed from radar data between 5-60 km from the KOKX radar in New York. Each panel represents a different year. We calculated the proportion of migration occurring beneath (or above) the radar beam at the light installation, out of sight of the radar. Labels describe the percentage of birds detected in the altitude (y-axis) sampled by each radar antenna elevation angle (0.5° in green, 1.5° in orange). From the 0.5° sweep proportions, we calculated the correction factor needed to estimate the total number of birds at all altitudes up to 4.5 km by finding the inverse. For example, the correction factor for 2015 was  $1/0.362 = 2.76$ .

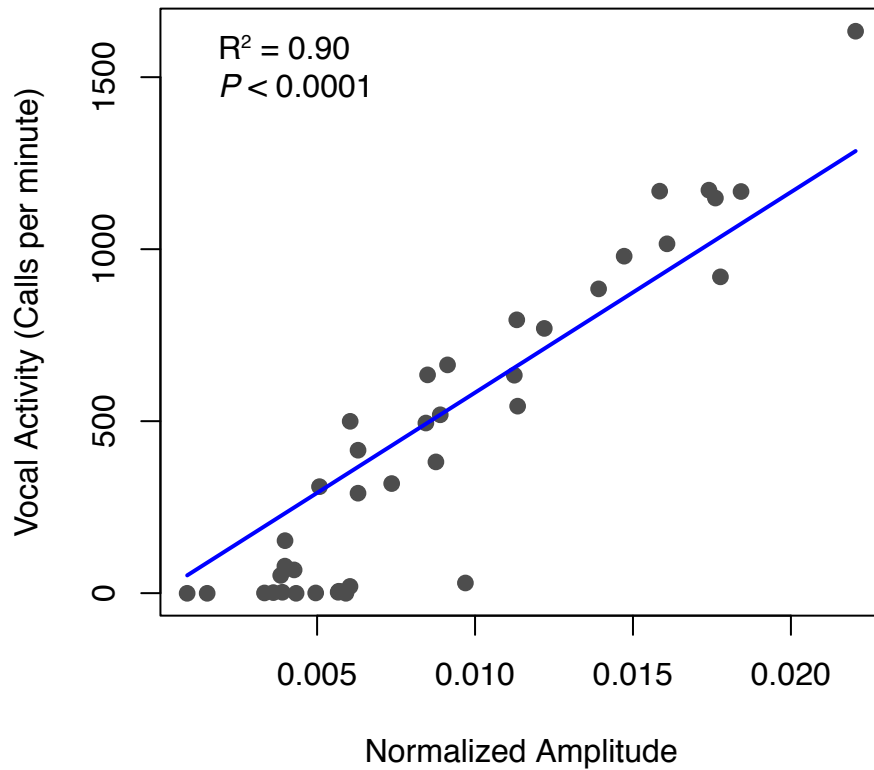

**Fig. S11. Relationship of flight call count and normalized amplitude, a calling activity index.** Regression of vocal activity on normalized amplitude for flight calls of nocturnally migrating birds in the 6-9 kHz range for 11-12 September 2015. Vocal activity is the number of flight calls counted in each one-minute audio recording. Normalized amplitude is the mean amplitude for the 6-9 kHz frequency band in each one-minute audio recording, normalized to unit.

**Table S1. Representative parameterizations of the simulation model, including the best fit parameters.**

|                           | <b>Disorientation probability</b> | <b>Disoriented flight directionality</b> | <b>Disorientation distance (<math>\sigma</math>)</b> | <b>Stabilization time [min]</b> | <b>Density increase factor</b> |
|---------------------------|-----------------------------------|------------------------------------------|------------------------------------------------------|---------------------------------|--------------------------------|
| <b>Model 1 (best fit)</b> | High (a=0.95)                     | Weak ( $\kappa=0.1$ )                    | 1500                                                 | 34                              | 19                             |
| <b>Model 2</b>            | High (a=0.95)                     | Moderate ( $\kappa=0.2$ )                | 1500                                                 | 51                              | 42                             |
| <b>Model 3</b>            | High (a=0.95)                     | None ( $\kappa=0$ )                      | 1500                                                 | 24                              | 8.0                            |
| <b>Model 4</b>            | Low (a=0.5)                       | Moderate ( $\kappa=0.2$ )                | 1500                                                 | 6.5                             | 3.0                            |
| <b>Model 5</b>            | Low (a=0.5)                       | Weak ( $\kappa=0.1$ )                    | 1500                                                 | 6.7                             | 2.3                            |

Stabilization time is defined as the time required to reach 95% of the steady state peak density at the lights, for a migratory ground speed of 10 m/s. Density increase factor is a multiplicative factor relative to the baseline migration density  $\rho$ .

**Table S2. Ranking of parameterizations of the migratory flow model (see Equation 2 for parameter definitions).**

| <b>Rank</b> | <b>a</b> | <b><math>\sigma</math></b> | <b><math>\kappa</math></b> | <b>Explained variance</b> |           |      |      |     |       |
|-------------|----------|----------------------------|----------------------------|---------------------------|-----------|------|------|-----|-------|
|             |          |                            |                            |                           | <b>23</b> | 0.75 | 1000 | 0.3 | 0.443 |
| <b>1</b>    | 0.95     | 1500                       | 0.1                        | 0.513                     | <b>24</b> | 0.65 | 1750 | 0.4 | 0.443 |
| <b>2</b>    | 0.95     | 1750                       | 0.1                        | 0.511                     | <b>25</b> | 0.95 | 750  | 0.2 | 0.439 |
| <b>3</b>    | 0.98     | 1250                       | 0.1                        | 0.510                     | <b>26</b> | 0.65 | 1500 | 0.4 | 0.436 |
| <b>4</b>    | 0.95     | 1250                       | 0.1                        | 0.506                     | <b>27</b> | 0.95 | 750  | 0.1 | 0.435 |
| <b>5</b>    | 0.95     | 2000                       | 0.1                        | 0.506                     | <b>28</b> | 0.75 | 750  | 0.4 | 0.434 |
| <b>6</b>    | 0.98     | 1500                       | 0.1                        | 0.505                     | <b>29</b> | 0.65 | 1000 | 0.5 | 0.434 |
| <b>7</b>    | 0.98     | 1000                       | 0.1                        | 0.502                     | <b>30</b> | 0.85 | 750  | 0.2 | 0.433 |
| <b>8</b>    | 0.98     | 1750                       | 0.1                        | 0.497                     | <b>31</b> | 0.95 | 500  | 0.2 | 0.432 |
| <b>9</b>    | 0.98     | 2000                       | 0.1                        | 0.489                     | <b>32</b> | 0.75 | 2000 | 0.2 | 0.431 |
| <b>10</b>   | 0.95     | 1000                       | 0.1                        | 0.484                     | <b>33</b> | 0.55 | 1500 | 0.7 | 0.431 |
| <b>11</b>   | 0.85     | 1250                       | 0.2                        | 0.480                     | <b>34</b> | 0.65 | 1250 | 0.5 | 0.430 |
| <b>12</b>   | 0.85     | 1500                       | 0.2                        | 0.478                     | <b>35</b> | 0.55 | 1250 | 0.7 | 0.430 |
| <b>13</b>   | 0.85     | 1750                       | 0.2                        | 0.473                     | <b>36</b> | 0.75 | 500  | 0.5 | 0.430 |
| <b>14</b>   | 0.85     | 1000                       | 0.2                        | 0.470                     | <b>37</b> | 0.55 | 1750 | 0.7 | 0.429 |
| <b>15</b>   | 0.75     | 2000                       | 0.3                        | 0.469                     | <b>38</b> | 0.85 | 2000 | 0.1 | 0.429 |
| <b>16</b>   | 0.85     | 2000                       | 0.2                        | 0.467                     | <b>39</b> | 0.55 | 2000 | 0.6 | 0.429 |
| <b>17</b>   | 0.75     | 1750                       | 0.3                        | 0.466                     | <b>40</b> | 0.95 | 250  | 0.6 | 0.429 |
| <b>18</b>   | 0.75     | 1500                       | 0.3                        | 0.463                     | <b>41</b> | 0.85 | 1750 | 0.1 | 0.427 |
| <b>19</b>   | 0.98     | 750                        | 0.1                        | 0.461                     | <b>42</b> | 0.65 | 750  | 0.6 | 0.427 |
| <b>20</b>   | 0.75     | 1250                       | 0.3                        | 0.457                     | <b>43</b> | 0.55 | 2000 | 0.7 | 0.427 |
| <b>21</b>   | 0.98     | 500                        | 0.2                        | 0.449                     | <b>44</b> | 0.85 | 250  | 0.8 | 0.426 |
| <b>22</b>   | 0.65     | 2000                       | 0.4                        | 0.448                     | <b>45</b> | 0.55 | 1750 | 0.6 | 0.425 |



|           |      |      |     |       |            |      |      |     |       |
|-----------|------|------|-----|-------|------------|------|------|-----|-------|
| <b>46</b> | 0.55 | 1000 | 0.8 | 0.425 | <b>88</b>  | 0.65 | 2000 | 0.3 | 0.389 |
| <b>47</b> | 0.65 | 1250 | 0.4 | 0.425 | <b>89</b>  | 0.85 | 250  | 0.6 | 0.388 |
| <b>48</b> | 0.65 | 500  | 0.7 | 0.425 | <b>90</b>  | 0.55 | 1500 | 0.8 | 0.388 |
| <b>49</b> | 0.75 | 1750 | 0.2 | 0.425 | <b>91</b>  | 0.98 | 2000 | 0   | 0.388 |
| <b>50</b> | 0.85 | 500  | 0.4 | 0.424 | <b>92</b>  | 0.45 | 1750 | 0.8 | 0.387 |
| <b>51</b> | 0.98 | 250  | 0.5 | 0.424 | <b>93</b>  | 0.98 | 250  | 0.4 | 0.387 |
| <b>52</b> | 0.55 | 1000 | 0.7 | 0.423 | <b>94</b>  | 0.55 | 1750 | 0.5 | 0.386 |
| <b>53</b> | 0.55 | 750  | 0.8 | 0.423 | <b>95</b>  | 0.65 | 1750 | 0.3 | 0.384 |
| <b>54</b> | 0.85 | 500  | 0.3 | 0.421 | <b>96</b>  | 0.65 | 1000 | 0.6 | 0.381 |
| <b>55</b> | 0.65 | 1500 | 0.5 | 0.421 | <b>97</b>  | 0.55 | 1500 | 0.5 | 0.379 |
| <b>56</b> | 0.98 | 250  | 0.6 | 0.421 | <b>98</b>  | 0.45 | 1500 | 0.8 | 0.379 |
| <b>57</b> | 0.85 | 1500 | 0.1 | 0.420 | <b>99</b>  | 0.95 | 1500 | 0   | 0.378 |
| <b>58</b> | 0.55 | 1500 | 0.6 | 0.420 | <b>100</b> | 0.95 | 1250 | 0   | 0.378 |
| <b>59</b> | 0.85 | 750  | 0.3 | 0.419 | <b>101</b> | 0.65 | 1500 | 0.3 | 0.377 |
| <b>60</b> | 0.65 | 500  | 0.8 | 0.419 | <b>102</b> | 0.55 | 500  | 0.8 | 0.377 |
| <b>61</b> | 0.65 | 750  | 0.5 | 0.418 | <b>103</b> | 0.85 | 1000 | 0.1 | 0.377 |
| <b>62</b> | 0.85 | 250  | 0.7 | 0.417 | <b>104</b> | 0.98 | 500  | 0.1 | 0.375 |
| <b>63</b> | 0.75 | 1500 | 0.2 | 0.415 | <b>105</b> | 0.75 | 1000 | 0.2 | 0.374 |
| <b>64</b> | 0.98 | 1250 | 0   | 0.413 | <b>106</b> | 0.65 | 750  | 0.4 | 0.374 |
| <b>65</b> | 0.95 | 500  | 0.3 | 0.413 | <b>107</b> | 0.95 | 1750 | 0   | 0.370 |
| <b>66</b> | 0.98 | 1500 | 0   | 0.412 | <b>108</b> | 0.98 | 750  | 0.2 | 0.369 |
| <b>67</b> | 0.95 | 250  | 0.5 | 0.412 | <b>109</b> | 0.55 | 1250 | 0.5 | 0.369 |
| <b>68</b> | 0.65 | 1750 | 0.5 | 0.412 | <b>110</b> | 0.95 | 250  | 0.4 | 0.369 |
| <b>69</b> | 0.55 | 1250 | 0.6 | 0.411 | <b>111</b> | 0.45 | 1250 | 0.8 | 0.368 |
| <b>70</b> | 0.75 | 750  | 0.3 | 0.410 | <b>112</b> | 0.55 | 1750 | 0.8 | 0.368 |
| <b>71</b> | 0.55 | 1250 | 0.8 | 0.409 | <b>113</b> | 0.98 | 750  | 0   | 0.366 |
| <b>72</b> | 0.65 | 1000 | 0.4 | 0.407 | <b>114</b> | 0.95 | 1000 | 0   | 0.366 |
| <b>73</b> | 0.85 | 1250 | 0.1 | 0.404 | <b>115</b> | 0.55 | 750  | 0.6 | 0.366 |
| <b>74</b> | 0.65 | 2000 | 0.5 | 0.404 | <b>116</b> | 0.65 | 1250 | 0.3 | 0.365 |
| <b>75</b> | 0.98 | 1750 | 0   | 0.403 | <b>117</b> | 0.65 | 750  | 0.7 | 0.365 |
| <b>76</b> | 0.65 | 500  | 0.6 | 0.401 | <b>118</b> | 0.65 | 500  | 0.5 | 0.361 |
| <b>77</b> | 0.55 | 750  | 0.7 | 0.401 | <b>119</b> | 0.45 | 2000 | 0.7 | 0.358 |
| <b>78</b> | 0.75 | 500  | 0.4 | 0.400 | <b>120</b> | 0.75 | 250  | 0.7 | 0.358 |
| <b>79</b> | 0.98 | 1000 | 0   | 0.399 | <b>121</b> | 0.95 | 2000 | 0   | 0.358 |
| <b>80</b> | 0.75 | 1250 | 0.2 | 0.399 | <b>122</b> | 0.85 | 500  | 0.2 | 0.355 |
| <b>81</b> | 0.75 | 500  | 0.6 | 0.395 | <b>123</b> | 0.45 | 1750 | 0.7 | 0.353 |
| <b>82</b> | 0.55 | 1000 | 0.6 | 0.395 | <b>124</b> | 0.95 | 500  | 0.1 | 0.353 |
| <b>83</b> | 0.95 | 250  | 0.7 | 0.394 | <b>125</b> | 0.55 | 1000 | 0.5 | 0.352 |
| <b>84</b> | 0.45 | 2000 | 0.8 | 0.392 | <b>126</b> | 0.45 | 1000 | 0.8 | 0.352 |
| <b>85</b> | 0.55 | 2000 | 0.5 | 0.391 | <b>127</b> | 0.98 | 500  | 0.3 | 0.350 |
| <b>86</b> | 0.75 | 1000 | 0.4 | 0.391 | <b>128</b> | 0.85 | 250  | 0.5 | 0.350 |
| <b>87</b> | 0.75 | 250  | 0.8 | 0.389 | <b>129</b> | 0.55 | 2000 | 0.8 | 0.350 |

|            |      |      |     |       |            |      |      |     |       |
|------------|------|------|-----|-------|------------|------|------|-----|-------|
| <b>130</b> | 0.65 | 1000 | 0.3 | 0.347 | <b>172</b> | 0.95 | 500  | 0   | 0.291 |
| <b>131</b> | 0.45 | 1500 | 0.7 | 0.346 | <b>173</b> | 0.98 | 250  | 0.2 | 0.291 |
| <b>132</b> | 0.55 | 500  | 0.7 | 0.345 | <b>174</b> | 0.65 | 250  | 0.7 | 0.291 |
| <b>133</b> | 0.75 | 500  | 0.3 | 0.343 | <b>175</b> | 0.45 | 1000 | 0.6 | 0.287 |
| <b>134</b> | 0.98 | 250  | 0.3 | 0.340 | <b>176</b> | 0.75 | 250  | 0.5 | 0.285 |
| <b>135</b> | 0.95 | 750  | 0   | 0.338 | <b>177</b> | 0.75 | 1000 | 0.1 | 0.282 |
| <b>136</b> | 0.75 | 750  | 0.2 | 0.338 | <b>178</b> | 0.85 | 500  | 0.1 | 0.282 |
| <b>137</b> | 0.98 | 250  | 0.7 | 0.337 | <b>179</b> | 0.45 | 500  | 0.8 | 0.281 |
| <b>138</b> | 0.85 | 750  | 0.1 | 0.337 | <b>180</b> | 0.55 | 750  | 0.4 | 0.280 |
| <b>139</b> | 0.55 | 2000 | 0.4 | 0.336 | <b>181</b> | 0.75 | 500  | 0.2 | 0.279 |
| <b>140</b> | 0.45 | 1250 | 0.7 | 0.335 | <b>182</b> | 0.45 | 2000 | 0.5 | 0.279 |
| <b>141</b> | 0.55 | 1750 | 0.4 | 0.332 | <b>183</b> | 0.65 | 1000 | 0.2 | 0.279 |
| <b>142</b> | 0.55 | 1500 | 0.4 | 0.327 | <b>184</b> | 0.85 | 1250 | 0   | 0.278 |
| <b>143</b> | 0.45 | 750  | 0.8 | 0.326 | <b>185</b> | 0.95 | 250  | 0.2 | 0.276 |
| <b>144</b> | 0.55 | 750  | 0.5 | 0.324 | <b>186</b> | 0.85 | 1500 | 0   | 0.276 |
| <b>145</b> | 0.75 | 250  | 0.6 | 0.322 | <b>187</b> | 0.55 | 2000 | 0.3 | 0.276 |
| <b>146</b> | 0.95 | 250  | 0.3 | 0.322 | <b>188</b> | 0.45 | 1750 | 0.5 | 0.276 |
| <b>147</b> | 0.45 | 1000 | 0.7 | 0.320 | <b>189</b> | 0.55 | 500  | 0.5 | 0.275 |
| <b>148</b> | 0.45 | 2000 | 0.6 | 0.320 | <b>190</b> | 0.55 | 1750 | 0.3 | 0.274 |
| <b>149</b> | 0.65 | 250  | 0.8 | 0.319 | <b>191</b> | 0.85 | 1000 | 0   | 0.273 |
| <b>150</b> | 0.75 | 750  | 0.5 | 0.319 | <b>192</b> | 0.35 | 2000 | 0.8 | 0.272 |
| <b>151</b> | 0.55 | 1250 | 0.4 | 0.318 | <b>193</b> | 0.55 | 1500 | 0.3 | 0.271 |
| <b>152</b> | 0.45 | 1750 | 0.6 | 0.315 | <b>194</b> | 0.45 | 1500 | 0.5 | 0.271 |
| <b>153</b> | 0.65 | 750  | 0.3 | 0.315 | <b>195</b> | 0.95 | 250  | 0.8 | 0.271 |
| <b>154</b> | 0.65 | 500  | 0.4 | 0.314 | <b>196</b> | 0.85 | 1750 | 0   | 0.271 |
| <b>155</b> | 0.98 | 500  | 0   | 0.312 | <b>197</b> | 0.35 | 1750 | 0.8 | 0.269 |
| <b>156</b> | 0.55 | 500  | 0.6 | 0.311 | <b>198</b> | 0.65 | 500  | 0.3 | 0.267 |
| <b>157</b> | 0.45 | 1500 | 0.6 | 0.309 | <b>199</b> | 0.45 | 750  | 0.6 | 0.267 |
| <b>158</b> | 0.85 | 250  | 0.4 | 0.307 | <b>200</b> | 0.55 | 1250 | 0.3 | 0.266 |
| <b>159</b> | 0.75 | 1250 | 0.4 | 0.305 | <b>201</b> | 0.85 | 250  | 0.3 | 0.265 |
| <b>160</b> | 0.65 | 1250 | 0.6 | 0.304 | <b>202</b> | 0.45 | 1250 | 0.5 | 0.264 |
| <b>161</b> | 0.55 | 1000 | 0.4 | 0.304 | <b>203</b> | 0.35 | 1500 | 0.8 | 0.264 |
| <b>162</b> | 0.75 | 1750 | 0.1 | 0.304 | <b>204</b> | 0.85 | 2000 | 0   | 0.263 |
| <b>163</b> | 0.75 | 2000 | 0.1 | 0.303 | <b>205</b> | 0.65 | 250  | 0.6 | 0.262 |
| <b>164</b> | 0.65 | 2000 | 0.2 | 0.303 | <b>206</b> | 0.85 | 750  | 0   | 0.259 |
| <b>165</b> | 0.65 | 1750 | 0.2 | 0.302 | <b>207</b> | 0.75 | 750  | 0.1 | 0.259 |
| <b>166</b> | 0.75 | 1500 | 0.1 | 0.301 | <b>208</b> | 0.45 | 500  | 0.7 | 0.257 |
| <b>167</b> | 0.45 | 1250 | 0.6 | 0.300 | <b>209</b> | 0.35 | 1250 | 0.8 | 0.256 |
| <b>168</b> | 0.65 | 1500 | 0.2 | 0.298 | <b>210</b> | 0.65 | 750  | 0.2 | 0.256 |
| <b>169</b> | 0.45 | 750  | 0.7 | 0.297 | <b>211</b> | 0.55 | 1000 | 0.3 | 0.256 |
| <b>170</b> | 0.75 | 1250 | 0.1 | 0.295 | <b>212</b> | 0.55 | 250  | 0.8 | 0.254 |
| <b>171</b> | 0.65 | 1250 | 0.2 | 0.292 | <b>213</b> | 0.45 | 1000 | 0.5 | 0.253 |

|            |      |      |     |       |            |      |      |     |       |
|------------|------|------|-----|-------|------------|------|------|-----|-------|
| <b>214</b> | 0.75 | 250  | 0.4 | 0.252 | <b>256</b> | 0.35 | 1500 | 0.6 | 0.216 |
| <b>215</b> | 0.85 | 1000 | 0.3 | 0.250 | <b>257</b> | 0.65 | 1000 | 0.1 | 0.216 |
| <b>216</b> | 0.98 | 250  | 0.1 | 0.248 | <b>258</b> | 0.55 | 250  | 0.6 | 0.212 |
| <b>217</b> | 0.35 | 2000 | 0.7 | 0.247 | <b>259</b> | 0.35 | 1250 | 0.6 | 0.212 |
| <b>218</b> | 0.35 | 1000 | 0.8 | 0.245 | <b>260</b> | 0.95 | 250  | 0   | 0.211 |
| <b>219</b> | 0.35 | 1750 | 0.7 | 0.244 | <b>261</b> | 0.75 | 1250 | 0   | 0.211 |
| <b>220</b> | 0.95 | 1000 | 0.2 | 0.242 | <b>262</b> | 0.55 | 1000 | 0.2 | 0.211 |
| <b>221</b> | 0.55 | 500  | 0.4 | 0.240 | <b>263</b> | 0.75 | 1500 | 0.4 | 0.211 |
| <b>222</b> | 0.35 | 1500 | 0.7 | 0.240 | <b>264</b> | 0.75 | 1000 | 0   | 0.210 |
| <b>223</b> | 0.45 | 2000 | 0.4 | 0.239 | <b>265</b> | 0.35 | 750  | 0.7 | 0.210 |
| <b>224</b> | 0.85 | 500  | 0.5 | 0.238 | <b>266</b> | 0.45 | 500  | 0.5 | 0.209 |
| <b>225</b> | 0.55 | 750  | 0.3 | 0.238 | <b>267</b> | 0.75 | 1500 | 0   | 0.208 |
| <b>226</b> | 0.45 | 1750 | 0.4 | 0.237 | <b>268</b> | 0.45 | 750  | 0.4 | 0.208 |
| <b>227</b> | 0.45 | 750  | 0.5 | 0.237 | <b>269</b> | 0.55 | 500  | 0.3 | 0.208 |
| <b>228</b> | 0.95 | 250  | 0.1 | 0.236 | <b>270</b> | 0.65 | 250  | 0.4 | 0.207 |
| <b>229</b> | 0.45 | 1500 | 0.4 | 0.234 | <b>271</b> | 0.35 | 500  | 0.8 | 0.204 |
| <b>230</b> | 0.75 | 500  | 0.7 | 0.234 | <b>272</b> | 0.75 | 750  | 0   | 0.204 |
| <b>231</b> | 0.65 | 250  | 0.5 | 0.234 | <b>273</b> | 0.35 | 1000 | 0.6 | 0.204 |
| <b>232</b> | 0.35 | 1250 | 0.7 | 0.234 | <b>274</b> | 0.65 | 750  | 0.1 | 0.204 |
| <b>233</b> | 0.85 | 500  | 0   | 0.233 | <b>275</b> | 0.75 | 1750 | 0   | 0.204 |
| <b>234</b> | 0.55 | 250  | 0.7 | 0.233 | <b>276</b> | 0.45 | 2000 | 0.3 | 0.202 |
| <b>235</b> | 0.45 | 500  | 0.6 | 0.232 | <b>277</b> | 0.85 | 250  | 0.1 | 0.202 |
| <b>236</b> | 0.85 | 250  | 0.2 | 0.232 | <b>278</b> | 0.45 | 1750 | 0.3 | 0.201 |
| <b>237</b> | 0.45 | 1250 | 0.4 | 0.229 | <b>279</b> | 0.45 | 250  | 0.8 | 0.200 |
| <b>238</b> | 0.35 | 750  | 0.8 | 0.229 | <b>280</b> | 0.45 | 1500 | 0.3 | 0.200 |
| <b>239</b> | 0.75 | 500  | 0.1 | 0.225 | <b>281</b> | 0.55 | 750  | 0.2 | 0.198 |
| <b>240</b> | 0.65 | 1500 | 0.6 | 0.224 | <b>282</b> | 0.75 | 2000 | 0   | 0.198 |
| <b>241</b> | 0.35 | 1000 | 0.7 | 0.224 | <b>283</b> | 0.35 | 2000 | 0.5 | 0.198 |
| <b>242</b> | 0.65 | 1500 | 0.1 | 0.224 | <b>284</b> | 0.45 | 1250 | 0.3 | 0.196 |
| <b>243</b> | 0.65 | 1750 | 0.1 | 0.223 | <b>285</b> | 0.35 | 1750 | 0.5 | 0.196 |
| <b>244</b> | 0.35 | 2000 | 0.6 | 0.222 | <b>286</b> | 0.75 | 250  | 0.2 | 0.194 |
| <b>245</b> | 0.65 | 1250 | 0.1 | 0.222 | <b>287</b> | 0.35 | 1500 | 0.5 | 0.194 |
| <b>246</b> | 0.65 | 500  | 0.2 | 0.222 | <b>288</b> | 0.35 | 750  | 0.6 | 0.192 |
| <b>247</b> | 0.98 | 250  | 0   | 0.221 | <b>289</b> | 0.55 | 250  | 0.5 | 0.192 |
| <b>248</b> | 0.45 | 1000 | 0.4 | 0.221 | <b>290</b> | 0.45 | 1000 | 0.3 | 0.191 |
| <b>249</b> | 0.65 | 2000 | 0.1 | 0.221 | <b>291</b> | 0.35 | 1250 | 0.5 | 0.190 |
| <b>250</b> | 0.75 | 250  | 0.3 | 0.221 | <b>292</b> | 0.75 | 500  | 0   | 0.190 |
| <b>251</b> | 0.55 | 1750 | 0.2 | 0.220 | <b>293</b> | 0.35 | 500  | 0.7 | 0.189 |
| <b>252</b> | 0.55 | 2000 | 0.2 | 0.220 | <b>294</b> | 0.45 | 500  | 0.4 | 0.186 |
| <b>253</b> | 0.35 | 1750 | 0.6 | 0.220 | <b>295</b> | 0.45 | 250  | 0.7 | 0.186 |
| <b>254</b> | 0.55 | 1500 | 0.2 | 0.220 | <b>296</b> | 0.65 | 250  | 0.3 | 0.184 |
| <b>255</b> | 0.55 | 1250 | 0.2 | 0.217 | <b>297</b> | 0.35 | 1000 | 0.5 | 0.184 |

|            |      |      |     |       |            |      |      |     |       |
|------------|------|------|-----|-------|------------|------|------|-----|-------|
| <b>298</b> | 0.25 | 2000 | 0.8 | 0.184 | <b>340</b> | 0.65 | 1750 | 0   | 0.162 |
| <b>299</b> | 0.65 | 500  | 0.1 | 0.183 | <b>341</b> | 0.25 | 750  | 0.8 | 0.162 |
| <b>300</b> | 0.85 | 250  | 0   | 0.183 | <b>342</b> | 0.35 | 500  | 0.5 | 0.160 |
| <b>301</b> | 0.45 | 750  | 0.3 | 0.182 | <b>343</b> | 0.25 | 1000 | 0.7 | 0.159 |
| <b>302</b> | 0.25 | 1750 | 0.8 | 0.182 | <b>344</b> | 0.75 | 250  | 0   | 0.159 |
| <b>303</b> | 0.65 | 750  | 0.8 | 0.180 | <b>345</b> | 0.65 | 2000 | 0   | 0.158 |
| <b>304</b> | 0.25 | 1500 | 0.8 | 0.179 | <b>346</b> | 0.35 | 750  | 0.4 | 0.158 |
| <b>305</b> | 0.55 | 500  | 0.2 | 0.178 | <b>347</b> | 0.45 | 250  | 0.5 | 0.158 |
| <b>306</b> | 0.25 | 1250 | 0.8 | 0.175 | <b>348</b> | 0.65 | 500  | 0   | 0.158 |
| <b>307</b> | 0.35 | 750  | 0.5 | 0.175 | <b>349</b> | 0.35 | 250  | 0.8 | 0.158 |
| <b>308</b> | 0.35 | 2000 | 0.4 | 0.175 | <b>350</b> | 0.45 | 750  | 0.2 | 0.158 |
| <b>309</b> | 0.35 | 500  | 0.6 | 0.174 | <b>351</b> | 0.25 | 2000 | 0.6 | 0.157 |
| <b>310</b> | 0.55 | 1500 | 0.1 | 0.174 | <b>352</b> | 0.25 | 1750 | 0.6 | 0.156 |
| <b>311</b> | 0.55 | 1250 | 0.1 | 0.174 | <b>353</b> | 0.55 | 250  | 0.3 | 0.155 |
| <b>312</b> | 0.35 | 1750 | 0.4 | 0.174 | <b>354</b> | 0.25 | 1500 | 0.6 | 0.154 |
| <b>313</b> | 0.75 | 250  | 0.1 | 0.173 | <b>355</b> | 0.35 | 2000 | 0.3 | 0.153 |
| <b>314</b> | 0.55 | 250  | 0.4 | 0.173 | <b>356</b> | 0.35 | 1750 | 0.3 | 0.153 |
| <b>315</b> | 0.55 | 1750 | 0.1 | 0.173 | <b>357</b> | 0.35 | 1500 | 0.3 | 0.152 |
| <b>316</b> | 0.35 | 1500 | 0.4 | 0.172 | <b>358</b> | 0.65 | 1750 | 0.6 | 0.152 |
| <b>317</b> | 0.45 | 250  | 0.6 | 0.172 | <b>359</b> | 0.55 | 500  | 0.1 | 0.152 |
| <b>318</b> | 0.55 | 2000 | 0.1 | 0.171 | <b>360</b> | 0.25 | 750  | 0.7 | 0.152 |
| <b>319</b> | 0.55 | 1000 | 0.1 | 0.171 | <b>361</b> | 0.25 | 1250 | 0.6 | 0.152 |
| <b>320</b> | 0.25 | 2000 | 0.7 | 0.170 | <b>362</b> | 0.35 | 1250 | 0.3 | 0.151 |
| <b>321</b> | 0.25 | 1000 | 0.8 | 0.170 | <b>363</b> | 0.65 | 250  | 0.1 | 0.150 |
| <b>322</b> | 0.35 | 1250 | 0.4 | 0.170 | <b>364</b> | 0.25 | 500  | 0.8 | 0.149 |
| <b>323</b> | 0.65 | 1000 | 0   | 0.169 | <b>365</b> | 0.35 | 250  | 0.7 | 0.149 |
| <b>324</b> | 0.65 | 1250 | 0   | 0.169 | <b>366</b> | 0.25 | 1000 | 0.6 | 0.148 |
| <b>325</b> | 0.25 | 1750 | 0.7 | 0.169 | <b>367</b> | 0.35 | 1000 | 0.3 | 0.148 |
| <b>326</b> | 0.45 | 1750 | 0.2 | 0.168 | <b>368</b> | 0.35 | 500  | 0.4 | 0.146 |
| <b>327</b> | 0.45 | 1500 | 0.2 | 0.168 | <b>369</b> | 0.45 | 500  | 0.2 | 0.146 |
| <b>328</b> | 0.45 | 2000 | 0.2 | 0.168 | <b>370</b> | 0.45 | 250  | 0.4 | 0.145 |
| <b>329</b> | 0.45 | 1250 | 0.2 | 0.167 | <b>371</b> | 0.25 | 2000 | 0.5 | 0.144 |
| <b>330</b> | 0.25 | 1500 | 0.7 | 0.166 | <b>372</b> | 0.25 | 1750 | 0.5 | 0.143 |
| <b>331</b> | 0.65 | 1500 | 0   | 0.166 | <b>373</b> | 0.35 | 750  | 0.3 | 0.143 |
| <b>332</b> | 0.65 | 750  | 0   | 0.166 | <b>374</b> | 0.25 | 1500 | 0.5 | 0.142 |
| <b>333</b> | 0.65 | 1000 | 0.7 | 0.166 | <b>375</b> | 0.25 | 750  | 0.6 | 0.142 |
| <b>334</b> | 0.35 | 1000 | 0.4 | 0.165 | <b>376</b> | 0.55 | 250  | 0.2 | 0.142 |
| <b>335</b> | 0.45 | 500  | 0.3 | 0.165 | <b>377</b> | 0.45 | 1250 | 0.1 | 0.141 |
| <b>336</b> | 0.55 | 750  | 0.1 | 0.164 | <b>378</b> | 0.25 | 500  | 0.7 | 0.141 |
| <b>337</b> | 0.65 | 250  | 0.2 | 0.164 | <b>379</b> | 0.55 | 1000 | 0   | 0.141 |
| <b>338</b> | 0.45 | 1000 | 0.2 | 0.164 | <b>380</b> | 0.45 | 1500 | 0.1 | 0.141 |
| <b>339</b> | 0.25 | 1250 | 0.7 | 0.163 | <b>381</b> | 0.25 | 1250 | 0.5 | 0.140 |

|            |      |      |     |       |            |      |      |     |       |
|------------|------|------|-----|-------|------------|------|------|-----|-------|
| <b>382</b> | 0.55 | 1250 | 0   | 0.140 | <b>424</b> | 0.25 | 250  | 0.7 | 0.120 |
| <b>383</b> | 0.35 | 250  | 0.6 | 0.140 | <b>425</b> | 0.25 | 1500 | 0.3 | 0.119 |
| <b>384</b> | 0.45 | 1000 | 0.1 | 0.140 | <b>426</b> | 0.45 | 750  | 0   | 0.119 |
| <b>385</b> | 0.45 | 1750 | 0.1 | 0.139 | <b>427</b> | 0.45 | 1250 | 0   | 0.119 |
| <b>386</b> | 0.55 | 750  | 0   | 0.139 | <b>428</b> | 0.25 | 1250 | 0.3 | 0.119 |
| <b>387</b> | 0.65 | 250  | 0   | 0.139 | <b>429</b> | 0.45 | 1500 | 0   | 0.118 |
| <b>388</b> | 0.45 | 2000 | 0.1 | 0.138 | <b>430</b> | 0.25 | 1000 | 0.3 | 0.117 |
| <b>389</b> | 0.55 | 1500 | 0   | 0.138 | <b>431</b> | 0.35 | 1250 | 0.1 | 0.117 |
| <b>390</b> | 0.25 | 1000 | 0.5 | 0.137 | <b>432</b> | 0.25 | 500  | 0.4 | 0.117 |
| <b>391</b> | 0.45 | 750  | 0.1 | 0.136 | <b>433</b> | 0.35 | 1500 | 0.1 | 0.117 |
| <b>392</b> | 0.55 | 1750 | 0   | 0.135 | <b>434</b> | 0.35 | 1000 | 0.1 | 0.117 |
| <b>393</b> | 0.55 | 500  | 0   | 0.135 | <b>435</b> | 0.45 | 500  | 0   | 0.117 |
| <b>394</b> | 0.35 | 1500 | 0.2 | 0.134 | <b>436</b> | 0.35 | 1750 | 0.1 | 0.116 |
| <b>395</b> | 0.35 | 1750 | 0.2 | 0.134 | <b>437</b> | 0.45 | 1750 | 0   | 0.116 |
| <b>396</b> | 0.35 | 500  | 0.3 | 0.133 | <b>438</b> | 0.35 | 2000 | 0.1 | 0.116 |
| <b>397</b> | 0.35 | 2000 | 0.2 | 0.133 | <b>439</b> | 0.45 | 250  | 0.1 | 0.115 |
| <b>398</b> | 0.45 | 250  | 0.3 | 0.133 | <b>440</b> | 0.35 | 250  | 0.3 | 0.115 |
| <b>399</b> | 0.35 | 1250 | 0.2 | 0.133 | <b>441</b> | 0.35 | 750  | 0.1 | 0.115 |
| <b>400</b> | 0.25 | 500  | 0.6 | 0.133 | <b>442</b> | 0.25 | 250  | 0.6 | 0.115 |
| <b>401</b> | 0.55 | 2000 | 0   | 0.132 | <b>443</b> | 0.25 | 750  | 0.3 | 0.114 |
| <b>402</b> | 0.25 | 750  | 0.5 | 0.132 | <b>444</b> | 0.45 | 2000 | 0   | 0.114 |
| <b>403</b> | 0.25 | 2000 | 0.4 | 0.132 | <b>445</b> | 0.98 | 250  | 0.8 | 0.112 |
| <b>404</b> | 0.35 | 1000 | 0.2 | 0.131 | <b>446</b> | 0.35 | 500  | 0.1 | 0.111 |
| <b>405</b> | 0.25 | 1750 | 0.4 | 0.131 | <b>447</b> | 0.25 | 500  | 0.3 | 0.110 |
| <b>406</b> | 0.35 | 250  | 0.5 | 0.131 | <b>448</b> | 0.25 | 250  | 0.5 | 0.109 |
| <b>407</b> | 0.55 | 250  | 0.1 | 0.131 | <b>449</b> | 0.45 | 250  | 0   | 0.109 |
| <b>408</b> | 0.25 | 1500 | 0.4 | 0.131 | <b>450</b> | 0.25 | 1500 | 0.2 | 0.109 |
| <b>409</b> | 0.25 | 1250 | 0.4 | 0.129 | <b>451</b> | 0.25 | 1750 | 0.2 | 0.109 |
| <b>410</b> | 0.45 | 500  | 0.1 | 0.129 | <b>452</b> | 0.25 | 1250 | 0.2 | 0.109 |
| <b>411</b> | 0.35 | 750  | 0.2 | 0.128 | <b>453</b> | 0.25 | 2000 | 0.2 | 0.109 |
| <b>412</b> | 0.25 | 1000 | 0.4 | 0.127 | <b>454</b> | 0.25 | 1000 | 0.2 | 0.108 |
| <b>413</b> | 0.25 | 250  | 0.8 | 0.125 | <b>455</b> | 0.35 | 250  | 0.2 | 0.107 |
| <b>414</b> | 0.25 | 500  | 0.5 | 0.125 | <b>456</b> | 0.25 | 750  | 0.2 | 0.106 |
| <b>415</b> | 0.75 | 1750 | 0.4 | 0.123 | <b>457</b> | 0.35 | 1000 | 0   | 0.105 |
| <b>416</b> | 0.25 | 750  | 0.4 | 0.123 | <b>458</b> | 0.25 | 250  | 0.4 | 0.104 |
| <b>417</b> | 0.45 | 250  | 0.2 | 0.123 | <b>459</b> | 0.35 | 750  | 0   | 0.104 |
| <b>418</b> | 0.35 | 250  | 0.4 | 0.123 | <b>460</b> | 0.35 | 1250 | 0   | 0.104 |
| <b>419</b> | 0.55 | 250  | 0   | 0.123 | <b>461</b> | 0.35 | 1500 | 0   | 0.103 |
| <b>420</b> | 0.35 | 500  | 0.2 | 0.121 | <b>462</b> | 0.25 | 500  | 0.2 | 0.103 |
| <b>421</b> | 0.45 | 1000 | 0   | 0.120 | <b>463</b> | 0.35 | 500  | 0   | 0.103 |
| <b>422</b> | 0.25 | 2000 | 0.3 | 0.120 | <b>464</b> | 0.35 | 250  | 0.1 | 0.102 |
| <b>423</b> | 0.25 | 1750 | 0.3 | 0.120 | <b>465</b> | 0.35 | 1750 | 0   | 0.102 |

|            |      |      |     |        |            |      |      |     |        |
|------------|------|------|-----|--------|------------|------|------|-----|--------|
| <b>466</b> | 0.35 | 2000 | 0   | 0.100  | <b>508</b> | 0.95 | 1750 | 0.2 | -0.688 |
| <b>467</b> | 0.25 | 1250 | 0.1 | 0.100  | <b>509</b> | 0.65 | 2000 | 0.7 | -0.834 |
| <b>468</b> | 0.25 | 1000 | 0.1 | 0.100  | <b>510</b> | 0.95 | 2000 | 0.2 | -0.877 |
| <b>469</b> | 0.25 | 1500 | 0.1 | 0.100  | <b>511</b> | 0.85 | 2000 | 0.3 | -0.884 |
| <b>470</b> | 0.25 | 250  | 0.3 | 0.100  | <b>512</b> | 0.75 | 1500 | 0.5 | -0.988 |
| <b>471</b> | 0.25 | 1750 | 0.1 | 0.099  | <b>513</b> | 0.65 | 1250 | 0.8 | -1.012 |
| <b>472</b> | 0.25 | 2000 | 0.1 | 0.099  | <b>514</b> | 0.98 | 750  | 0.3 | -1.058 |
| <b>473</b> | 0.25 | 750  | 0.1 | 0.099  | <b>515</b> | 0.98 | 1500 | 0.2 | -1.152 |
| <b>474</b> | 0.35 | 250  | 0   | 0.098  | <b>516</b> | 0.85 | 1000 | 0.4 | -1.170 |
| <b>475</b> | 0.25 | 500  | 0.1 | 0.097  | <b>517</b> | 0.75 | 750  | 0.7 | -1.234 |
| <b>476</b> | 0.25 | 250  | 0.2 | 0.095  | <b>518</b> | 0.75 | 1000 | 0.6 | -1.246 |
| <b>477</b> | 0.25 | 1000 | 0   | 0.093  | <b>519</b> | 0.95 | 500  | 0.5 | -1.480 |
| <b>478</b> | 0.25 | 750  | 0   | 0.092  | <b>520</b> | 0.75 | 1750 | 0.5 | -1.485 |
| <b>479</b> | 0.25 | 1250 | 0   | 0.092  | <b>521</b> | 0.98 | 1750 | 0.2 | -1.544 |
| <b>480</b> | 0.25 | 500  | 0   | 0.092  | <b>522</b> | 0.85 | 750  | 0.5 | -1.656 |
| <b>481</b> | 0.25 | 250  | 0.1 | 0.092  | <b>523</b> | 0.65 | 1500 | 0.8 | -1.721 |
| <b>482</b> | 0.25 | 1500 | 0   | 0.091  | <b>524</b> | 0.98 | 2000 | 0.2 | -1.774 |
| <b>483</b> | 0.25 | 1750 | 0   | 0.091  | <b>525</b> | 0.85 | 500  | 0.7 | -1.849 |
| <b>484</b> | 0.65 | 2000 | 0.6 | 0.090  | <b>526</b> | 0.75 | 2000 | 0.5 | -1.939 |
| <b>485</b> | 0.25 | 2000 | 0   | 0.090  | <b>527</b> | 0.95 | 1000 | 0.3 | -2.342 |
| <b>486</b> | 0.25 | 250  | 0   | 0.089  | <b>528</b> | 0.65 | 1750 | 0.8 | -2.405 |
| <b>487</b> | 0.75 | 2000 | 0.4 | 0.048  | <b>529</b> | 0.75 | 1250 | 0.6 | -2.866 |
| <b>488</b> | 0.95 | 500  | 0.4 | 0.000  | <b>530</b> | 0.85 | 1250 | 0.4 | -2.874 |
| <b>489</b> | 0.75 | 1000 | 0.5 | -0.009 | <b>531</b> | 0.98 | 500  | 0.5 | -2.956 |
| <b>490</b> | 0.85 | 750  | 0.4 | -0.017 | <b>532</b> | 0.65 | 2000 | 0.8 | -3.036 |
| <b>491</b> | 0.85 | 1250 | 0.3 | -0.024 | <b>533</b> | 0.75 | 750  | 0.8 | -3.627 |
| <b>492</b> | 0.98 | 1000 | 0.2 | -0.036 | <b>534</b> | 0.95 | 750  | 0.4 | -3.947 |
| <b>493</b> | 0.95 | 1250 | 0.2 | -0.080 | <b>535</b> | 0.75 | 1000 | 0.7 | -4.327 |
| <b>494</b> | 0.65 | 1250 | 0.7 | -0.095 | <b>536</b> | 0.98 | 1000 | 0.3 | -4.512 |
| <b>495</b> | 0.75 | 750  | 0.6 | -0.121 | <b>537</b> | 0.75 | 1500 | 0.6 | -4.726 |
| <b>496</b> | 0.75 | 500  | 0.8 | -0.148 | <b>538</b> | 0.85 | 1500 | 0.4 | -4.827 |
| <b>497</b> | 0.85 | 1500 | 0.3 | -0.330 | <b>539</b> | 0.85 | 500  | 0.8 | -4.907 |
| <b>498</b> | 0.65 | 1000 | 0.8 | -0.342 | <b>540</b> | 0.95 | 1250 | 0.3 | -5.230 |
| <b>499</b> | 0.95 | 750  | 0.3 | -0.343 | <b>541</b> | 0.95 | 500  | 0.6 | -5.441 |
| <b>500</b> | 0.65 | 1500 | 0.7 | -0.363 | <b>542</b> | 0.85 | 1000 | 0.5 | -6.224 |
| <b>501</b> | 0.85 | 500  | 0.6 | -0.375 | <b>543</b> | 0.85 | 750  | 0.6 | -6.239 |
| <b>502</b> | 0.98 | 500  | 0.4 | -0.404 | <b>544</b> | 0.75 | 1750 | 0.6 | -6.633 |
| <b>503</b> | 0.95 | 1500 | 0.2 | -0.413 | <b>545</b> | 0.85 | 1750 | 0.4 | -6.778 |
| <b>504</b> | 0.75 | 1250 | 0.5 | -0.476 | <b>546</b> | 0.98 | 750  | 0.4 | -7.255 |
| <b>505</b> | 0.65 | 1750 | 0.7 | -0.613 | <b>547</b> | 0.95 | 1500 | 0.3 | -8.295 |
| <b>506</b> | 0.98 | 1250 | 0.2 | -0.613 | <b>548</b> | 0.75 | 2000 | 0.6 | -8.465 |
| <b>507</b> | 0.85 | 1750 | 0.3 | -0.622 | <b>549</b> | 0.85 | 2000 | 0.4 | -8.575 |

|            |      |      |     |         |            |      |      |     |          |
|------------|------|------|-----|---------|------------|------|------|-----|----------|
| <b>550</b> | 0.75 | 1250 | 0.7 | -8.934  | <b>592</b> | 0.98 | 750  | 0.6 | -70.780  |
| <b>551</b> | 0.98 | 1250 | 0.3 | -9.110  | <b>593</b> | 0.98 | 1000 | 0.5 | -73.467  |
| <b>552</b> | 0.98 | 500  | 0.6 | -9.677  | <b>594</b> | 0.98 | 1750 | 0.4 | -77.936  |
| <b>553</b> | 0.95 | 1750 | 0.3 | -11.025 | <b>595</b> | 0.95 | 1250 | 0.5 | -89.209  |
| <b>554</b> | 0.75 | 1000 | 0.8 | -11.236 | <b>596</b> | 0.98 | 2000 | 0.4 | -90.429  |
| <b>555</b> | 0.85 | 1250 | 0.5 | -13.151 | <b>597</b> | 0.85 | 1750 | 0.6 | -96.345  |
| <b>556</b> | 0.95 | 2000 | 0.3 | -13.198 | <b>598</b> | 0.95 | 750  | 0.7 | -103.050 |
| <b>557</b> | 0.95 | 1000 | 0.4 | -13.471 | <b>599</b> | 0.85 | 1250 | 0.7 | -111.371 |
| <b>558</b> | 0.98 | 1500 | 0.3 | -13.605 | <b>600</b> | 0.85 | 2000 | 0.6 | -122.358 |
| <b>559</b> | 0.95 | 500  | 0.7 | -14.428 | <b>601</b> | 0.85 | 1000 | 0.8 | -123.388 |
| <b>560</b> | 0.75 | 1500 | 0.7 | -14.517 | <b>602</b> | 0.95 | 1000 | 0.6 | -124.318 |
| <b>561</b> | 0.95 | 750  | 0.5 | -15.404 | <b>603</b> | 0.98 | 1250 | 0.5 | -130.153 |
| <b>562</b> | 0.85 | 750  | 0.7 | -17.141 | <b>604</b> | 0.95 | 1500 | 0.5 | -132.428 |
| <b>563</b> | 0.98 | 1750 | 0.3 | -17.310 | <b>605</b> | 0.98 | 750  | 0.7 | -155.340 |
| <b>564</b> | 0.98 | 2000 | 0.3 | -19.997 | <b>606</b> | 0.95 | 1750 | 0.5 | -171.749 |
| <b>565</b> | 0.75 | 1750 | 0.7 | -20.494 | <b>607</b> | 0.85 | 1500 | 0.7 | -178.203 |
| <b>566</b> | 0.85 | 1000 | 0.6 | -20.537 | <b>608</b> | 0.98 | 1000 | 0.6 | -180.789 |
| <b>567</b> | 0.85 | 1500 | 0.5 | -21.369 | <b>609</b> | 0.98 | 1500 | 0.5 | -184.610 |
| <b>568</b> | 0.98 | 1000 | 0.4 | -22.608 | <b>610</b> | 0.95 | 750  | 0.8 | -203.001 |
| <b>569</b> | 0.75 | 1250 | 0.8 | -22.733 | <b>611</b> | 0.95 | 2000 | 0.5 | -203.649 |
| <b>570</b> | 0.98 | 500  | 0.7 | -24.601 | <b>612</b> | 0.95 | 1250 | 0.6 | -222.692 |
| <b>571</b> | 0.98 | 750  | 0.5 | -26.141 | <b>613</b> | 0.98 | 1750 | 0.5 | -231.989 |
| <b>572</b> | 0.75 | 2000 | 0.7 | -26.430 | <b>614</b> | 0.85 | 1250 | 0.8 | -244.790 |
| <b>573</b> | 0.95 | 1250 | 0.4 | -26.878 | <b>615</b> | 0.85 | 1750 | 0.7 | -246.927 |
| <b>574</b> | 0.85 | 1750 | 0.5 | -29.869 | <b>616</b> | 0.95 | 1000 | 0.7 | -264.610 |
| <b>575</b> | 0.95 | 500  | 0.8 | -32.206 | <b>617</b> | 0.98 | 2000 | 0.5 | -267.853 |
| <b>576</b> | 0.75 | 1500 | 0.8 | -37.081 | <b>618</b> | 0.98 | 750  | 0.8 | -288.022 |
| <b>577</b> | 0.85 | 2000 | 0.5 | -37.933 | <b>619</b> | 0.98 | 1250 | 0.6 | -303.941 |
| <b>578</b> | 0.85 | 750  | 0.8 | -39.875 | <b>620</b> | 0.85 | 2000 | 0.7 | -310.405 |
| <b>579</b> | 0.95 | 1500 | 0.4 | -41.054 | <b>621</b> | 0.95 | 1500 | 0.6 | -320.917 |
| <b>580</b> | 0.98 | 1250 | 0.4 | -42.277 | <b>622</b> | 0.98 | 1000 | 0.7 | -361.090 |
| <b>581</b> | 0.85 | 1250 | 0.6 | -42.543 | <b>623</b> | 0.85 | 1500 | 0.8 | -383.141 |
| <b>582</b> | 0.95 | 750  | 0.6 | -44.196 | <b>624</b> | 0.95 | 1750 | 0.6 | -410.141 |
| <b>583</b> | 0.95 | 1000 | 0.5 | -47.127 | <b>625</b> | 0.98 | 1500 | 0.6 | -422.130 |
| <b>584</b> | 0.75 | 1750 | 0.8 | -52.964 | <b>626</b> | 0.95 | 1250 | 0.7 | -450.091 |
| <b>585</b> | 0.98 | 500  | 0.8 | -53.090 | <b>627</b> | 0.95 | 1000 | 0.8 | -477.357 |
| <b>586</b> | 0.95 | 1750 | 0.4 | -53.987 | <b>628</b> | 0.95 | 2000 | 0.6 | -480.191 |
| <b>587</b> | 0.85 | 1000 | 0.7 | -54.590 | <b>629</b> | 0.85 | 1750 | 0.8 | -522.227 |
| <b>588</b> | 0.98 | 1500 | 0.4 | -61.498 | <b>630</b> | 0.98 | 1750 | 0.6 | -526.678 |
| <b>589</b> | 0.95 | 2000 | 0.4 | -64.603 | <b>631</b> | 0.98 | 1250 | 0.7 | -582.412 |
| <b>590</b> | 0.85 | 1500 | 0.6 | -68.887 | <b>632</b> | 0.98 | 2000 | 0.6 | -602.974 |
| <b>591</b> | 0.75 | 2000 | 0.8 | -69.060 | <b>633</b> | 0.98 | 1000 | 0.8 | -617.452 |

---

|            |      |      |     |           |
|------------|------|------|-----|-----------|
| <b>634</b> | 0.95 | 1500 | 0.7 | -634.218  |
| <b>635</b> | 0.85 | 2000 | 0.8 | -645.770  |
| <b>636</b> | 0.95 | 1250 | 0.8 | -780.255  |
| <b>637</b> | 0.98 | 1500 | 0.7 | -799.078  |
| <b>638</b> | 0.95 | 1750 | 0.7 | -802.104  |
| <b>639</b> | 0.95 | 2000 | 0.7 | -927.590  |
| <b>640</b> | 0.98 | 1250 | 0.8 | -969.468  |
| <b>641</b> | 0.98 | 1750 | 0.7 | -992.204  |
| <b>642</b> | 0.95 | 1500 | 0.8 | -1084.839 |
| <b>643</b> | 0.98 | 2000 | 0.7 | -1124.301 |
| <b>644</b> | 0.98 | 1500 | 0.8 | -1323.739 |
| <b>645</b> | 0.95 | 1750 | 0.8 | -1361.783 |
| <b>646</b> | 0.95 | 2000 | 0.8 | -1555.051 |
| <b>647</b> | 0.98 | 1750 | 0.8 | -1636.593 |
| <b>648</b> | 0.98 | 2000 | 0.8 | -1833.526 |

---



**Table S3. Local climatic data from KNYC, Central Park, for 11-12 September.**

| <b>Year</b> | <b>Time (EDT)</b> | <b>Temp.</b> | <b>Dew Point</b> | <b>Humidity</b> | <b>Pressure</b> | <b>Visibility</b> | <b>Wind Dir</b> | <b>Wind Speed</b> | <b>Precip</b> | <b>Conditions</b> |
|-------------|-------------------|--------------|------------------|-----------------|-----------------|-------------------|-----------------|-------------------|---------------|-------------------|
| <b>2008</b> | 7:51 PM           | 17.78        | 12.22            | 54%             | 1026            | 16.09             | SE              | 9.33              | N/A           | Clear             |
|             | 8:51 PM           | 18.28        | 12.22            | 63%             | 1027            | 16.09             | SSE             | Calm              | N/A           | Clear             |
|             | 9:51 PM           | 18.28        | 12.22            | 63%             | 1026            | 16.09             | Variable        | 7.40              | N/A           | Clear             |
|             | 10:51 PM          | 18.89        | 12.22            | 68%             | 1026            | 16.09             | Variable        | 7.40              | N/A           | Clear             |
|             | 11:51 PM          | 18.28        | 12.78            | 68%             | 1026            | 16.09             | Variable        | 9.33              | N/A           | Scattered Clouds  |
|             | 12:51 AM          | 18.28        | 12.22            | 68%             | 1025            | 16.09             | Variable        | 11.10             | N/A           | Overcast          |
|             | 1:51 AM           | 18.89        | 12.22            | 73%             | 1025            | 16.09             | SSE             | 5.63              | N/A           | Scattered Clouds  |
|             | 2:51 AM           | 18.28        | 12.78            | 70%             | 1024            | 16.09             | Variable        | 7.40              | N/A           | Scattered Clouds  |
|             | 3:51 AM           | 18.89        | 12.22            | 73%             | 1024            | 16.09             | Variable        | 7.40              | N/A           | Clear             |
|             | 4:51 AM           | 18.89        | 12.78            | 73%             | 1023            | 16.09             | Variable        | 5.63              | N/A           | Clear             |
| 5:51 AM     | 18.89             | 12.22        | 73%              | 1024            | 16.09           | Variable          | Calm            | N/A               | Clear         |                   |
| <b>2010</b> | 7:51 PM           | 20.61        | 11.11            | 54%             | 1015            | 16.09             | SE              | 13.04             | N/A           | Clear             |
|             | 8:51 PM           | 19.39        | 12.22            | 63%             | 1016            | 16.09             | SSE             | 13.04             | N/A           | Clear             |
|             | 9:51 PM           | 20.00        | 12.78            | 63%             | 1017            | 16.09             | Variable        | 11.10             | N/A           | Clear             |
|             | 10:51 PM          | 19.39        | 13.28            | 68%             | 1017            | 16.09             | Variable        | 9.33              | N/A           | Clear             |
|             | 11:51 PM          | 19.39        | 13.28            | 68%             | 1018            | 16.09             | Variable        | 5.63              | N/A           | Scattered Clouds  |
|             | 12:51 AM          | 19.39        | 13.28            | 68%             | 1018            | 16.09             | Variable        | 9.33              | N/A           | Overcast          |
|             | 1:51 AM           | 18.28        | 13.28            | 73%             | 1017            | 16.09             | SSE             | 13.04             | N/A           | Scattered Clouds  |
|             | 2:51 AM           | 18.89        | 13.28            | 70%             | 1017            | 16.09             | Variable        | 5.63              | N/A           | Scattered Clouds  |
|             | 3:51 AM           | 18.28        | 13.28            | 73%             | 1016            | 16.09             | Variable        | 9.33              | N/A           | Clear             |
|             | 4:51 AM           | 18.28        | 13.28            | 73%             | 1017            | 16.09             | Variable        | 11.10             | N/A           | Clear             |
| 5:51 AM     | 17.78             | 12.78        | 73%              | 1017            | 16.09           | Variable          | 9.33            | N/A               | Clear         |                   |
| <b>2012</b> | 7:51 PM           | 18.89        | 6.72             | 55%             | 1025            | 16.09             | Variable        | 5.63              | N/A           | Mostly Cloudy     |
|             | 8:51 PM           | 18.89        | 6.11             | 59%             | 1025            | 16.09             | North           | Calm              | N/A           | Clear             |
|             | 9:51 PM           | 18.28        | 8.28             | 61%             | 1025            | 16.09             | SW              | Calm              | N/A           | Clear             |
|             | 10:51 PM          | 18.28        | 9.39             | 63%             | 1025            | 16.09             | Variable        | 5.63              | N/A           | Scattered Clouds  |
|             | 11:51 PM          | 18.28        | 8.89             | 67%             | 1025            | 16.09             | Variable        | 5.63              | N/A           | Clear             |
|             | 12:51 AM          | 18.28        | 8.28             | 67%             | 1026            | 16.09             | SW              | 7.40              | N/A           | Clear             |
|             | 1:51 AM           | 17.78        | 10.00            | 65%             | 1026            | 16.09             | SW              | Calm              | N/A           | Clear             |
|             | 2:51 AM           | 17.22        | 8.89             | 69%             | 1026            | 16.09             | Variable        | Calm              | N/A           | Clear             |
| 3:51 AM     | 17.22             | 9.39         | 69%              | 1026            | 16.09           | Variable          | Calm            | N/A               | Mostly Cloudy |                   |

|             |          |       |       |     |      |       |          |       |     |                  |
|-------------|----------|-------|-------|-----|------|-------|----------|-------|-----|------------------|
|             | 4:51 AM  | 16.11 | 10.00 | 71% | 1027 | 16.09 | SW       | 5.63  | N/A | Partly Cloudy    |
|             | 5:51 AM  | 15.61 | 11.11 | 74% | 1011 | 16.09 | Variable | Calm  | N/A | Clear            |
| <b>2013</b> | 7:51 PM  | 31.11 | 21.11 | 55% | 1017 | 12.87 | Variable | 5.63  | N/A | Mostly Cloudy    |
|             | 8:51 PM  | 30.00 | 21.11 | 59% | 1017 | 12.87 | North    | 7.24  | N/A | Clear            |
|             | 9:51 PM  | 29.39 | 21.11 | 61% | 1016 | 14.48 | SW       | 11.10 | N/A | Clear            |
|             | 10:51 PM | 28.89 | 21.11 | 63% | 1017 | 12.87 | Variable | 7.40  | N/A | Scattered Clouds |
|             | 11:51 PM | 27.78 | 21.11 | 67% | 1016 | 12.87 | Variable | 9.33  | N/A | Clear            |
|             | 12:51 AM | 27.78 | 21.11 | 67% | 1015 | 12.87 | SW       | 9.33  | N/A | Clear            |
|             | 1:51 AM  | 27.22 | 20.00 | 65% | 1014 | 12.87 | SW       | 9.33  | N/A | Clear            |
|             | 2:51 AM  | 26.11 | 20.00 | 69% | 1014 | 11.27 | Variable | 7.40  | N/A | Clear            |
|             | 3:51 AM  | 26.11 | 20.00 | 69% | 1014 | 11.27 | Variable | 5.63  | N/A | Mostly Cloudy    |
|             | 4:51 AM  | 25.61 | 20.00 | 71% | 1014 | 11.27 | SW       | 5.63  | N/A | Partly Cloudy    |
|             | 5:51 AM  | 25.00 | 20.00 | 74% | 1014 | 11.27 | Variable | 9.33  | N/A | Clear            |
| <b>2014</b> | 7:51 PM  | 26.11 | 19.39 | 54% | 1012 | 16.09 | Calm     | 5.63  | N/A | Scattered Clouds |
|             | 8:51 PM  | 26.11 | 19.39 | 57% | 1012 | 16.09 | Variable | Calm  | N/A | Clear            |
|             | 9:51 PM  | 26.11 | 19.39 | 57% | 1013 | 16.09 | Calm     | 11.10 | N/A | Clear            |
|             | 10:51 PM | 24.39 | 15.61 | 57% | 1014 | 16.09 | Calm     | 5.63  | N/A | Clear            |
|             | 11:51 PM | 22.22 | 12.78 | 66% | 1015 | 16.09 | Calm     | 7.40  | N/A | Clear            |
|             | 12:51 AM | 21.11 | 11.72 | 71% | 1015 | 16.09 | Calm     | 13.04 | N/A | Clear            |
|             | 1:51 AM  | 20.00 | 11.72 | 73% | 1016 | 16.09 | Calm     | 9.33  | N/A | Clear            |
|             | 2:51 AM  | 19.39 | 11.11 | 78% | 1016 | 16.09 | NE       | 7.40  | N/A | Clear            |
|             | 3:51 AM  | 18.28 | 11.11 | 81% | 1018 | 16.09 | Calm     | 5.63  | N/A | Clear            |
|             | 4:33 AM  | 17.78 | 10.61 | 84% | 1017 | 16.09 | Calm     | 9.33  | N/A | Clear            |
|             | 4:51 AM  | 17.78 | 10.61 | 81% | 1018 | 16.09 | West     | 7.40  | N/A | Clear            |
|             | 5:51 AM  | 17.22 | 10.00 | 37% | 0    | 0.00  | Variable | 0.00  | N/A | Clear            |
| <b>2015</b> | 7:51 PM  | 24.39 | 14.39 | 54% | 1009 | 16.09 | Calm     | Calm  | N/A | Scattered Clouds |
|             | 8:51 PM  | 23.89 | 15.00 | 57% | 1009 | 16.09 | Variable | 5.63  | N/A | Clear            |
|             | 9:51 PM  | 23.89 | 15.00 | 57% | 1009 | 16.09 | Calm     | Calm  | N/A | Clear            |
|             | 10:51 PM | 23.89 | 15.00 | 57% | 1010 | 16.09 | Calm     | Calm  | N/A | Clear            |
|             | 11:51 PM | 23.28 | 16.72 | 66% | 1010 | 16.09 | Calm     | Calm  | N/A | Clear            |
|             | 12:51 AM | 22.78 | 17.22 | 71% | 1010 | 16.09 | Calm     | Calm  | N/A | Clear            |
|             | 1:51 AM  | 22.22 | 17.22 | 73% | 1009 | 16.09 | Calm     | Calm  | N/A | Clear            |
|             | 2:51 AM  | 21.72 | 17.78 | 78% | 1009 | 16.09 | NE       | 5.63  | N/A | Clear            |

|             |          |       |       |     |      |       |          |       |     |       |
|-------------|----------|-------|-------|-----|------|-------|----------|-------|-----|-------|
|             | 3:51 AM  | 21.72 | 18.28 | 81% | 1009 | 16.09 | Calm     | Calm  | N/A | Clear |
|             | 4:51 AM  | 21.11 | 18.28 | 84% | 1009 | 16.09 | Calm     | Calm  | N/A | Clear |
|             | 5:51 AM  | 21.11 | 17.78 | 81% | 1010 | 16.09 | West     | 5.63  | N/A | Clear |
| <b>2016</b> | 7:51 PM  | 24.39 | 8.89  | 37% | 1019 | 16.09 | Variable | 5.63  | N/A | Clear |
|             | 8:51 PM  | 23.89 | 8.89  | 38% | 1020 | 16.09 | Variable | 7.40  | N/A | Clear |
|             | 9:51 PM  | 22.22 | 8.28  | 41% | 1020 | 16.09 | Variable | 5.63  | N/A | Clear |
|             | 10:51 PM | 21.11 | 7.78  | 42% | 1021 | 16.09 | Variable | 7.40  | N/A | Clear |
|             | 11:51 PM | 20.61 | 7.78  | 44% | 1021 | 16.09 | NNW      | 9.33  | N/A | Clear |
|             | 12:51 AM | 20.00 | 7.78  | 45% | 1022 | 16.09 | Variable | 7.40  | N/A | Clear |
|             | 1:51 AM  | 19.39 | 7.78  | 47% | 1022 | 16.09 | Variable | 7.40  | N/A | Clear |
|             | 2:51 AM  | 18.89 | 7.78  | 48% | 1022 | 16.09 | ENE      | 11.10 | N/A | Clear |
|             | 3:51 AM  | 18.28 | 7.22  | 48% | 1022 | 16.09 | ENE      | 13.04 | N/A | Clear |
|             | 4:51 AM  | 16.72 | 8.28  | 58% | 1023 | 16.09 | East     | 13.04 | N/A | Clear |
|             | 5:51 AM  | 17.22 | 8.28  | 56% | 1023 | 16.09 | ENE      | 9.33  | N/A | Clear |

**Table S4. METARS data from KEWR, Newark Liberty International Airport, for 11-12 September. UTC refers to Coordinated Universal Time.**

| <b>Year</b> | <b>UTC</b>                                                             | <b>Full METAR</b>                                                                 |
|-------------|------------------------------------------------------------------------|-----------------------------------------------------------------------------------|
| <b>2008</b> | 23:51                                                                  | 18008KT 10SM FEW070 SCT250 20/12 A3031 RMK AO2 SLP263 T02000117 10228 20200 53001 |
|             | 00:51                                                                  | 19006KT 10SM BKN060 BKN250 19/12 A3031                                            |
|             | 01:51                                                                  | 19006KT 10SM BKN060 BKN250 19/12 A3032 RMK AO2 SLP266 T01940122                   |
|             | 02:51                                                                  | 18006KT 10SM SCT055 BKN250 19/12 A3031 RMK AO2 SLP262 T01890117 58000             |
|             | 03:51                                                                  | 19005KT 10SM BKN060 BKN250 19/12 A3030 RMK AO2 SLP259 T01890117                   |
|             | 04:51                                                                  | 20006KT 10SM BKN060 19/12 A3029 RMK AO2 SLP257 T01890117 402280161                |
|             | 04:58                                                                  | 19006KT 10SM SCT055 OVC070 19/12 A3027 RMK AO2 SLP250 T01890122 10200 20189 58012 |
|             | 05:13                                                                  | 19004KT 10SM BKN050 OVC070 19/12 A3026 RMK AO2 SLP245 T01890117                   |
|             | 05:51                                                                  | 20007KT 10SM OVC048 19/12 A3025 RMK AO2 SLP242 T01890117                          |
|             | 06:51                                                                  | 21005KT 10SM OVC044 19/12 A3024 RMK AO2 SLP238 T01890122 56013                    |
|             | 07:51                                                                  | 20005KT 10SM FEW030 OVC042 19/12 A3022 RMK AO2 SLP232 T01890122                   |
|             | <b>2010</b>                                                            | 23:51                                                                             |
| 00:51       |                                                                        | 13007KT 10SM BKN250 21/13 A3000 RMK AO2 SLP157 T02110128                          |
| 01:51       |                                                                        | 17005KT 10SM BKN250 20/13 A3002 RMK AO2 SLP166 T02000128                          |
| 02:51       |                                                                        | 17004KT 10SM BKN250 20/13 A3004 RMK AO2 SLP170 T02000133 51020                    |
| 03:51       |                                                                        | 16005KT 10SM FEW035 BKN250 20/13 A3004 RMK AO2 SLP172 T02000133                   |
| 04:51       |                                                                        | 14007KT 10SM BKN035 BKN250 20/14 A3004 RMK AO2 SLP171 T02000144 402780144         |
| 04:58       |                                                                        | 14007KT 10SM BKN027 BKN037 20/14 A3004 RMK AO2                                    |
| 05:13       |                                                                        | 14007KT 10SM SCT027 BKN035 20/14 A3004 RMK AO2                                    |
| 05:51       |                                                                        | 14007KT 10SM FEW027 SCT035 19/14 A3004 RMK AO2 SLP171 T01940139 10217 20194 51001 |
| 06:51       |                                                                        | 13006KT 10SM FEW037 19/14 A3003 RMK AO2 SLP168 T01940139                          |
| 07:51       |                                                                        | 11005KT 10SM FEW037 SCT090 BKN250 19/14 A3000 RMK AO2 SLP159 T01940144            |
| 08:51       |                                                                        | 11007KT 10SM FEW027 SCT110 BKN250 19/13 A3001 RMK AO2 SLP162 T01890133 55009      |
| 09:51       | 11004KT 10SM FEW027 BKN110 BKN250 19/13 A3001 RMK AO2 SLP162 T01890133 |                                                                                   |
| <b>2012</b> | 23:51                                                                  | 25006KT 10SM SCT260 22/08 A3024 RMK AO2 SLP240 T02170083 10250 20211 53006        |
|             | 00:51                                                                  | 25005KT 10SM FEW260 21/08 A3026 RMK AO2 SLP248 T02110083                          |
|             | 01:51                                                                  | 24003KT 10SM FEW250 19/09 A3027 RMK AO2 SLP250 T01940089                          |
|             | 02:51                                                                  | 25006KT 10SM FEW250 19/09 A3027 RMK AO2 SLP251 T01890094 51011                    |
|             | 03:51                                                                  | 21003KT 10SM CLR 18/09 A3028 RMK AO2 SLP252 T01780094                             |
|             | 04:51                                                                  | 23005KT 10SM CLR 16/10 A3028 RMK AO2 SLP254 T01610100 402500117                   |

---

|             |       |                                                                                          |
|-------------|-------|------------------------------------------------------------------------------------------|
|             | 05:51 | 23004KT 10SM CLR 16/10 A3029 RMK AO2 SLP257 T01560100 10217 20156 53006                  |
|             | 06:51 | 00000KT 10SM CLR 16/11 A3030 RMK AO2 SLP258 T01560106                                    |
|             | 07:51 | 22004KT 10SM CLR 14/11 A3030 RMK AO2 SLP258 T01440106                                    |
|             | 08:51 | 27003KT 10SM CLR 15/11 A3031 RMK AO2 SLP262 T01500106 53004                              |
|             | 09:51 | 00000KT 10SM FEW250 14/11 A3032 RMK AO2 SLP266 T01390106                                 |
| <b>2013</b> | 23:51 | 22011KT 10SM FEW050 SCT200 BKN250 31/21 A3001 RMK AO2 SLP162 T03110211 10356 20311 53012 |
|             | 00:51 | 19008KT 10SM FEW015 SCT050 OVC250 31/22 A3002 RMK AO2 SLP165 T03060217                   |
|             | 01:51 | 20010KT 10SM OVC250 29/22 A3001 RMK AO2 SLP162 T02940217                                 |
|             | 02:51 | 22006KT 10SM SCT038 OVC250 29/22 A3001 RMK AO2 SLP163 T02890217 51001                    |
|             | 03:51 | 22009KT 10SM SCT045 OVC250 28/22 A2999 RMK AO2 SLP156 T02780217                          |
|             | 04:51 | 20009KT 9SM FEW050 OVC250 27/22 A2997 RMK AO2 SLP148 T02670217 403560239                 |
|             | 05:51 | 20008KT 9SM BKN250 26/21 A2995 RMK AO2 SLP142 T02610211 10311 20261 56021                |
|             | 06:51 | 19006KT 9SM BKN250 26/21 A2995 RMK AO2 SLP141 T02560211                                  |
|             | 07:51 | 20008KT 8SM SCT055 BKN250 25/21 A2994 RMK AO2 SLP139 T02500211                           |
|             | 08:51 | 21006KT 8SM SCT055 BKN250 24/21 A2994 RMK AO2 SLP136 T02440211 58005                     |
|             | 09:51 | 21006KT 7SM FEW055 BKN250 24/21 A2994 RMK AO2 SLP136 T02390211                           |
| <b>2014</b> | 23:51 | 25007KT 10SM FEW040 SCT120 SCT250 27/20 A2985 RMK AO2 SLP107 T02720200 10300 20272 53009 |
|             | 00:51 | 26007KT 10SM FEW040 SCT120 SCT250 27/20 A2987 RMK AO2 SLP114 T02670200                   |
|             | 01:51 | 29010KT 10SM FEW045 SCT250 26/20 A2989 RMK AO2 SLP121 T02610200                          |
|             | 02:51 | 33013G19KT 10SM FEW045 SCT250 24/17 A2992 RMK AO2 SLP131 T02440167 53024                 |
|             | 03:51 | 35014G19KT 10SM FEW045 SCT250 22/14 A2995 RMK AO2 SLP141 T02220139                       |
|             | 04:51 | 34009KT 10SM FEW050 SCT250 21/12 A2997 RMK AO2 SLP147 T02060122 403000189                |
|             | 05:51 | 34010G19KT 10SM FEW250 20/12 A2997 RMK AO2 SLP149 T02000122 10272 20200 51018            |
|             | 06:51 | 34012KT 10SM FEW050 SCT250 19/12 A2999 RMK AO2 SLP154 T01890122                          |
|             | 07:51 | 34013KT 10SM FEW025 SCT050 SCT250 18/12 A3002 RMK AO2 SLP164 T01830117                   |
|             | 08:51 | 34009KT 10SM FEW025 SCT050 SCT250 17/11 A3003 RMK AO2 SLP168 T01720111 51020             |
|             | 09:51 | 34012G18KT 10SM FEW025 17/11 A3005 RMK AO2 SLP175 T01670106                              |
| <b>2015</b> | 23:51 | VRB04KT 10SM FEW045 SCT250 27/16 A2978 RMK AO2 SLP084 T02670156 10289 20256 53012        |
|             | 00:51 | 00000KT 10SM FEW045 SCT250 25/17 A2980 RMK AO2 SLP091 T02500167                          |
|             | 01:51 | 11004KT 10SM FEW045 SCT250 24/17 A2981 RMK AO2 SLP093 T02440167                          |
|             | 02:51 | 00000KT 10SM FEW045 SCT250 23/19 A2981 RMK AO2 SLP095 T02330189 51011                    |
|             | 03:51 | 00000KT 10SM FEW050 23/19 A2982 RMK AO2 SLP096 T02280189                                 |
|             | 04:51 | 17003KT 10SM FEW050 22/18 A2982 RMK AO2 SLP096 T02170183 402890189                       |

---

---

|             |       |                                                                            |
|-------------|-------|----------------------------------------------------------------------------|
|             | 05:51 | 15003KT 10SM FEW050 21/18 A2981 RMK AO2 SLP094 T02110183 10267 20206 58001 |
|             | 06:51 | 19004KT 10SM FEW050 20/18 A2981 RMK AO2 SLP093 T02000178                   |
|             | 07:51 | 18003KT 10SM FEW050 SCT250 20/18 A2981 RMK AO2 SLP094 T02000183            |
|             | 08:51 | 00000KT 10SM FEW050 SCT250 19/18 A2981 RMK AO2 SLP094 T01940178 56000      |
|             | 09:51 | 00000KT 10SM SCT050 SCT250 19/17 A2982 RMK AO2 SLP098 T01890172            |
| <b>2016</b> | 23:51 | 32013KT 10SM BKN250 25/08 A3008 RMK AO2 SLP185 T02500078 10300 20250 53023 |
|             | 00:51 | 32012KT 10SM BKN250 24/07 A3011 RMK AO2 SLP195 T02390072                   |
|             | 01:51 | 34011KT 10SM BKN250 23/07 A3013 RMK AO2 SLP202 T02280072                   |
|             | 02:51 | 35009KT 10SM BKN250 22/08 A3015 RMK AO2 SLP208 T02170078 51023             |
|             | 03:51 | 34011KT 10SM SCT250 21/08 A3016 RMK AO2 SLP212 T02060078                   |
|             | 04:51 | 36008KT 10SM SCT250 19/08 A3017 RMK AO2 SLP217 T01890078 403000189         |
|             | 05:51 | 02007KT 10SM SCT250 17/08 A3017 RMK AO2 SLP216 T01670078 10250 20167 50008 |
|             | 06:51 | 01007KT 10SM SCT250 17/08 A3018 RMK AO2 SLP220 T01670078                   |
|             | 07:51 | 02007KT 10SM FEW250 15/08 A3019 RMK AO2 SLP222 T01500078                   |
|             | 08:51 | 01006KT 10SM CLR 14/08 A3020 RMK AO2 SLP227 T01440083 53011                |
|             | 09:51 | 36007KT 10SM FEW250 16/09 A3022 RMK AO2 SLP231 T01610089                   |

---

Full details of the codes and abbreviations for METARS data are available from <http://www.ofcm.gov/publications/fmh/FMH1/FMH1.pdf>.

# Model Information and Additional Calculations

## Contents

|                                                    |           |
|----------------------------------------------------|-----------|
| <b>Peak effects</b>                                | <b>2</b>  |
| <b>Standardized peak density</b>                   | <b>2</b>  |
| 0.5° elevation angle . . . . .                     | 2         |
| 1.5° elevation angle . . . . .                     | 4         |
| <b>Max number of birds within 500 m of the TiL</b> | <b>7</b>  |
| 0.5° elevation angle . . . . .                     | 7         |
| 1.5° elevation angle . . . . .                     | 8         |
| <b>Average effects</b>                             | <b>11</b> |
| <b>Numbers of birds</b>                            | <b>11</b> |
| 0.5° elevation angle . . . . .                     | 11        |
| 1.5° elevation angle . . . . .                     | 13        |
| <b>Standardized peak density</b>                   | <b>17</b> |
| 0.5° elevation angle . . . . .                     | 17        |
| 1.5° elevation angle . . . . .                     | 19        |
| <b>Radial velocity</b>                             | <b>23</b> |
| 0.5° elevation angle . . . . .                     | 23        |
| <b>Number of flight calls</b>                      | <b>26</b> |
| <b>Number of birds affected by the lights</b>      | <b>29</b> |

This document presents detailed results for all non-simulation analyses, focusing on linear model output and diagnostics.

```
library(mgcv)      # v 1.8-17 - gam
library(regr0)    # v 1.0-5 - logst
library(lattice)
library(Hmisc)
library(ggplot2)
library(cowplot)
```

*Note on transformations:* We use the *logst* function in the *regr0* package to log-transform our data when necessary. This function is equivalent to a  $\log_{10}$  transformation for all but the smallest values, which are scaled such that the transformation yields finite values (e.g. because  $\log_{10}(0)$  is undefined). We chose this option because, unlike adding an arbitrary constant value of 1 to all observations, this method of scaling small values is determined by the distribution of the data, and importantly it only modifies the smallest observations, leaving all others unchanged.

---

## Peak effects

The following models include one data point for each continuous period of illumination or darkness: the maximum value observed during that period.

## Standardized peak density

Standardized peak density is defined as:

$$\frac{\max(\eta_{0-0.5km}) - \text{mean}(\eta_{2-20km})}{\text{sd}(\eta_{2-20km})}$$

Where  $\eta_{0-0.5km}$  is the set of bird density values within 0.5 km of the Tribute and  $\eta_{2-20km}$  is the set of bird density values between 2-20 km from the Tribute.

In all cases, we compare three models with the following parametric effects using AIC:

1. *light* + *year* + *light* × *year*
2. *light* + *year*
3. *light*

Here, *light* is a two-level categorical variable describing whether the Tribute was illuminated or not, and *year* is a four-level categorical variable describing the year in which that observation occurred.

We used the model with the lowest AIC score, unless there was a difference of less than 1 AIC unit separating the models. In this case, we used the model with the fewest parametric effects.

## 0.5° elevation angle

```
m1 = gam(logst(val)~light*year,data=light.df.g %>% filter(elev==1 & the.type=="max.peak.std"))
m2 = gam(logst(val)~light+year,data=light.df.g %>% filter(elev==1 & the.type=="max.peak.std"))
m3 = gam(logst(val)~light,data=light.df.g %>% filter(elev==1 & the.type=="max.peak.std"))
AIC(m1,m2,m3)
```



```
##      df      AIC
## m1 11 116.7996
## m2  7 120.8748
## m3  3 116.3087
```

```
bm = m3
```

The best model is model 3, which includes *light* only.

```
summary(bm)
```

```
##
## Family: gaussian
## Link function: identity
##
## Formula:
## logst(val) ~ light
##
## Parametric coefficients:
##              Estimate Std. Error t value Pr(>|t|)
## (Intercept) -0.2890    0.1555  -1.858   0.069 .
## light        1.1487    0.2014   5.703 6.32e-07 ***
## ---
## Signif. codes:  0 '***' 0.001 '**' 0.01 '*' 0.05 '.' 0.1 ' ' 1
##
## R-sq.(adj) = 0.382  Deviance explained = 39.4%
## GCV = 0.52829  Scale est. = 0.50797  n = 52
```

The main effect of *light* is 1.149, which can be back-transformed as  $10^{1.149}$  and interpreted as a multiplicative factor. In other words, the model indicates that the maximum standardized peak bird density observed during an illuminated period was  $10^{1.149} = 14$  times greater than during dark periods, on average.

Results summarized for the main text:

```
res = summary(bm)$p.table
res = cbind(res,Factor=10^(res[, "Estimate"]))
# Effect of light after exponentiating the coefficient to get multiplicative factor
print.model.summary(res[2,5],res[2,3],res[2,4],units="x",effect.word="factor")
```

```
## [1] "factor = 14x, t = 5.70, P < 0.0001"
```

We now examine two important model diagnostic plots. The first is a standard quantile-quantile (or ‘qq’) plot, showing the distribution of the residuals compared to the quantiles of a normal distribution. Also plotted are the distributions of 1000 datasets simulated under the model, to show how much variation is expected if all assumptions are fulfilled. In this instance, all points are well within the gray lines; there is no evidence for a deviation from this assumption.

```
qq.gam(bm,rep=1000,pch=1,level=1)
```

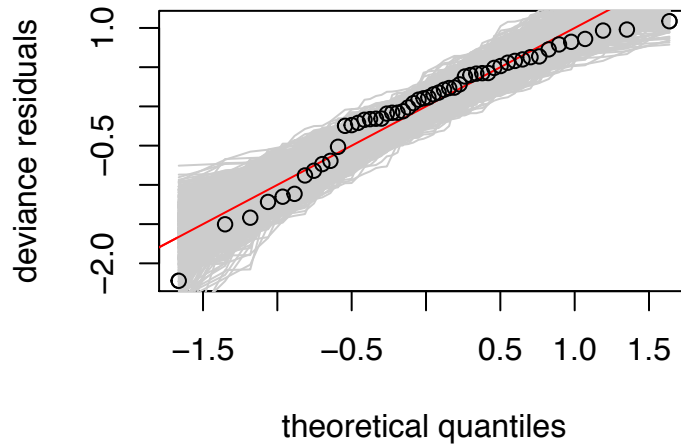

Next, we examine a Tukey-Anscombe plot, the model residuals vs. the fitted values. There doesn't appear to be significant structure left in the data, and the variance of the residuals appears constant throughout, so there is no evidence for any deviation.

```
plot.lme(bm,type=c("p","smooth"),col.line="black")
```

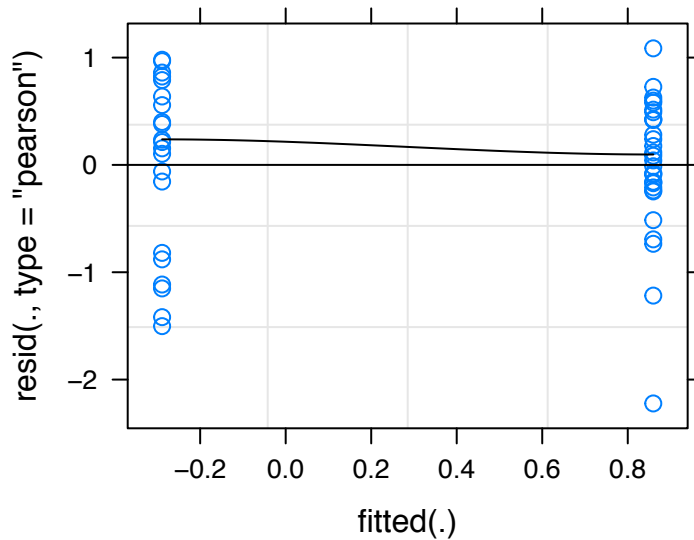

## 1.5° elevation angle

This section runs the same models as the previous section, but with data from the high-altitude radar sweep (~1.5° elevation angle).

```
m1 = gam(logst(val)~light*year,
         data=light.df.g %>% filter(elev==1.5 & the.type=="max.peak.std"))
m2 = gam(logst(val)~light+year,
         data=light.df.g %>% filter(elev==1.5 & the.type=="max.peak.std"))
m3 = gam(logst(val)~light,
         data=light.df.g %>% filter(elev==1.5 & the.type=="max.peak.std"))
AIC(m1,m2,m3)
```

```
##      df      AIC
## m1  11 116.2694
## m2   7 113.1496
```

```
## m3 3 111.4823
```

```
bm = m3
```

Again, the best model is model 3, which includes *light* only.

```
summary(bm)
```

```
##
## Family: gaussian
## Link function: identity
##
## Formula:
## logst(val) ~ light
##
## Parametric coefficients:
##           Estimate Std. Error t value Pr(>|t|)
## (Intercept) -0.6449    0.1365  -4.723  1.8e-05 ***
## light        0.5859    0.1802   3.251  0.00202 **
## ---
## Signif. codes:  0 '***' 0.001 '**' 0.01 '*' 0.05 '.' 0.1 ' ' 1
##
## R-sq.(adj) = 0.153  Deviance explained = 16.9%
## GCV = 0.44529  Scale est. = 0.4288    n = 54
```

Here there is one main effect of *light*, and the model indicates that maximum standardized peak bird densities were  $10^{0.58} = 3.9$  times higher during illuminated periods, on average.

Results for the main text:

```
res = summary(bm)$p.table
res = cbind(res,Factor=10^(res[, "Estimate"]))
# Effect of light after exponentiating the coefficient to get multiplicative factor
print.model.summary(res[2,5],res[2,3],res[2,4],units="x",effect.word="factor")
```

```
## [1] "factor = 3.9x, t = 3.25, P = 0.0020"
```

All points are within the gray simulated lines.

```
qq.gam(bm,rep=1000,pch=1,level=1)
```

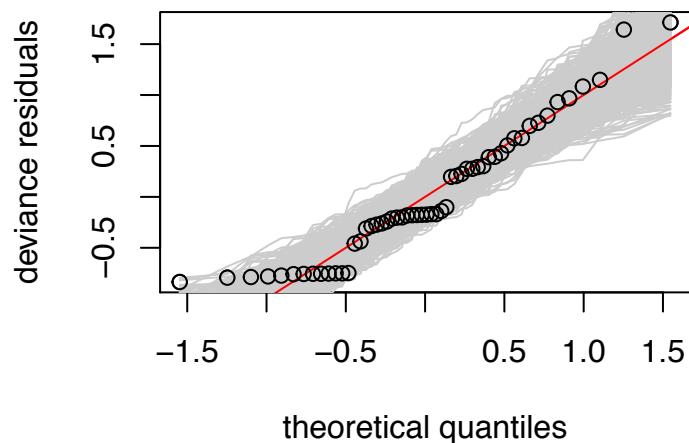

The Tukey-Anscombe plot suggests that the variance may be increasing, but the difference is not extreme.

```
plot.lme(bm,type=c("p","r"),col.line="black")
```

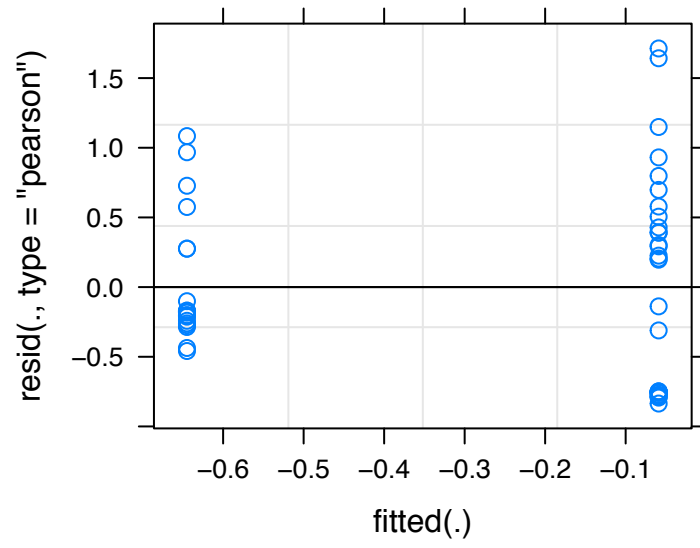

## Max number of birds within 500 m of the TiL

This section performs the same analysis as the previous section, except the response variable is the maximum number of birds detected within 500 m of the TiL during a continuous illuminated/dark period.

### 0.5° elevation angle

```
m1 = gam(logst(val)~light*year,data=light.df.g %>% filter(elev==1 & the.type=="max.nbirds"))
m2 = gam(logst(val)~light+year,data=light.df.g %>% filter(elev==1 & the.type=="max.nbirds"))
m3 = gam(logst(val)~light,data=light.df.g %>% filter(elev==1 & the.type=="max.nbirds"))
AIC(m1,m2,m3)
```

```
##      df      AIC
## m1  11 83.99201
## m2   7 78.16597
## m3   3 94.05718
```

```
bm = m2
```

The best model is model 2, which includes the *light* and *year* but not their interaction.

```
summary(bm)
```

```
##
## Family: gaussian
## Link function: identity
##
## Formula:
## logst(val) ~ light + year
##
## Parametric coefficients:
##              Estimate Std. Error t value Pr(>|t|)
## (Intercept)  2.08254    0.15619  13.333 < 2e-16 ***
## light         0.52534    0.13506   3.890 0.000321 ***
## year2012     -0.21004    0.23543  -0.892 0.376952
## year2013     -0.01684    0.20056  -0.084 0.933460
## year2015      0.70110    0.17818   3.935 0.000279 ***
## year2016      0.07999    0.22361   0.358 0.722184
## ---
## Signif. codes:  0 '***' 0.001 '**' 0.01 '*' 0.05 '.' 0.1 ' ' 1
##
## R-sq.(adj) =  0.406   Deviance explained = 46.4%
## GCV = 0.25699   Scale est. = 0.22734   n = 52
```

Here there is one main effect of *light*, and the model indicates that maximum number of birds within 500 m of the TiL was  $10^{0.53} = 3.4$  times higher during illuminated periods, on average.

Results for the main text:

```
res = summary(bm)$p.table
res = cbind(res,Factor=10^(res[, "Estimate"]))
# Effect of light after exponentiating the coefficient to get multiplicative factor
print.model.summary(res[2,5],res[2,3],res[2,4],units="x",effect.word="factor")
```

```
## [1] "factor = 3.4x, t = 3.89, P = 0.0003"
```

No evidence for any deviation.

```
qq.gam(bm,rep=1000,pch=1,level=1)
```

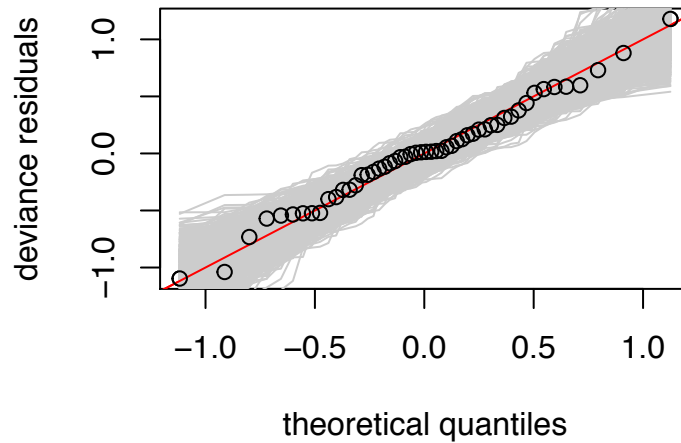

Negligible structure in the residuals.

```
plot.lme(bm,type=c("p","smooth"),col.line="black")
```

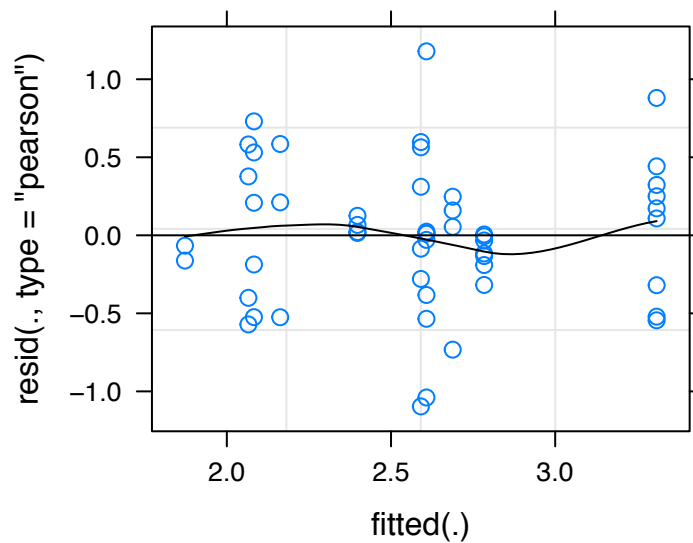

## 1.5° elevation angle

This section runs the same models as the previous section, but with data from the high-altitude radar scan.

```
m1 = gam(logst(val)~light*year,data=light.df.g %>% filter(elev==1.5 & the.type=="max.nbirds"))
m2 = gam(logst(val)~light+year,data=light.df.g %>% filter(elev==1.5 & the.type=="max.nbirds"))
m3 = gam(logst(val)~light,data=light.df.g %>% filter(elev==1.5 & the.type=="max.nbirds"))
AIC(m1,m2,m3)
```

```
##      df      AIC
## m1  11 141.5482
## m2   7 136.9647
## m3   3 141.4726
```

```
bm = m2
```

The best model is model 2, which includes *light* and *year*, but not their interaction.

```
summary(bm)
```

```
##
## Family: gaussian
## Link function: identity
##
## Formula:
## logst(val) ~ light + year
##
## Parametric coefficients:
##           Estimate Std. Error t value Pr(>|t|)
## (Intercept) -0.05014   0.26089  -0.192  0.84840
## light        0.51996   0.22204   2.342  0.02339 *
## year2012    -0.52410   0.39566  -1.325  0.19156
## year2013    -0.69052   0.33707  -2.049  0.04599 *
## year2015    -0.06806   0.29279  -0.232  0.81717
## year2016    -1.07497   0.37580  -2.861  0.00625 **
## ---
## Signif. codes:  0 '***' 0.001 '**' 0.01 '*' 0.05 '.' 0.1 ' ' 1
##
## R-sq.(adj) = 0.191  Deviance explained = 26.7%
## GCV = 0.72239  Scale est. = 0.64213  n = 54
```

Here there is one main effect of *light*, and the model indicates that maximum number of birds within 500 m of the TiL was  $10^{0.52} = 3.3$  times higher during illuminated periods, on average.

Results for the main text:

```
res = summary(bm)$p.table
res = cbind(res,Factor=10^(res[, "Estimate"]))
# Effect of light after exponentiating the coefficient to get multiplicative factor
print.model.summary(res[2,5],res[2,3],res[2,4],units="x",effect.word="factor")
```

```
## [1] "factor = 3.3x, t = 2.34, P = 0.0234"
```

No evidence for any deviation.

```
qq.gam(bm,rep=1000,pch=1,level=1)
```

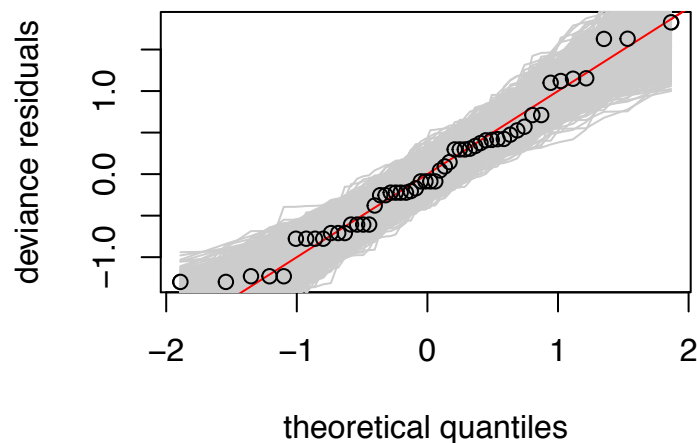

The variance may be increasing, although the sample size of points at low x-values is small. No other structure

is apparent in the data, which have already been log-transformed. Furthermore, if anything, this would likely make our test conservative.

```
plot.lme(bm,type=c("p","smooth"),col.line="black")
```

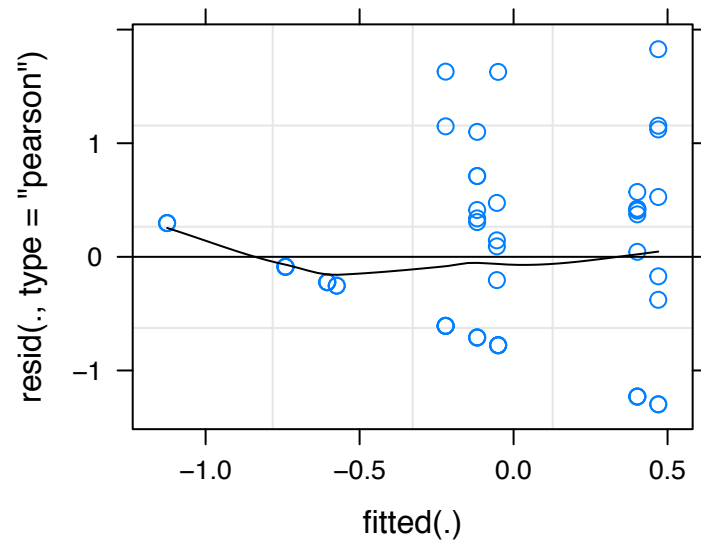



## Average effects

The following models include all data points (not just one per light/dark period). To account for any autocorrelation in the data, we introduce two additional predictor variables as smooth terms: time of night (*TIME*) and baseline bird density (*BIRD\_DENSITY*). These smooth terms account for variation explained by temporal changes in bird numbers through the night and as a result of changes in baseline bird density—separate from any effect of the Tribute in Light (*LIGHT*).

## Numbers of birds

### 0.5° elevation angle

We test for effect of light on the total number of birds present in the cylinder with radius 500 m and height 4.5 km, calculated from the 0.5° elevation angle sweep.

```
# 'stationary.radar.model.light' is a custom function to construct the necessary models
# and compare AIC values
n.birds.e1.model = stationary.radar.model.light(response.name="logst(n.birds.cyl.e1)",
                                              the.data=dt1,elev="e1")
```

```
##                df      AIC
## mod.light      23.37065 98.69452
## mod.light.year 24.82408 101.31629
## mod.interact   29.16755 105.87983
```

```
bm = n.birds.e1.model
```

The best model includes *light* only.

```
summary(bm)
```

```
##
## Family: gaussian
## Link function: identity
##
## Formula:
## eval(parse(text = response.name)) ~ eval(LIGHT) + s(as.numeric(eval(TIME))),
##   by = year) + s(eval(BIRD_DENSITY), by = year)
##
## Parametric coefficients:
##               Estimate Std. Error t value Pr(>|t|)
## (Intercept)  -718.92637  230.15140  -3.124  0.00207 **
## eval(LIGHT)1    0.52562    0.05628   9.339 < 2e-16 ***
## ---
## Signif. codes:  0 '***' 0.001 '**' 0.01 '*' 0.05 '.' 0.1 ' ' 1
##
## Approximate significance of smooth terms:
##               edf Ref.df      F p-value
## s(as.numeric(eval(TIME))):year2010  1.034  1.057  8.904  0.00238 **
## s(as.numeric(eval(TIME))):year2012  1.026  1.051  9.156  0.00230 **
## s(as.numeric(eval(TIME))):year2013  1.848  1.968  5.132  0.00967 **
## s(as.numeric(eval(TIME))):year2015  1.000  1.000  9.802  0.00201 **
## s(as.numeric(eval(TIME))):year2016  1.000  1.000  9.790  0.00203 **
## s(eval(BIRD_DENSITY)):year2010      6.049  6.942 14.895 3.52e-16 ***
```

```
## s(eval(BIRD_DENSITY)):year2012      1.000  1.000  0.000  0.99561
## s(eval(BIRD_DENSITY)):year2013      1.919  2.017 36.520 1.34e-13 ***
## s(eval(BIRD_DENSITY)):year2015      3.307  4.055 21.332 5.33e-15 ***
## s(eval(BIRD_DENSITY)):year2016      2.187  2.583 19.321 1.02e-05 ***
## ---
## Signif. codes:  0 '***' 0.001 '**' 0.01 '*' 0.05 '.' 0.1 ' ' 1
##
## R-sq.(adj) =  0.806   Deviance explained = 82.6%
## GCV = 0.094149   Scale est. = 0.084072   n = 209
```

Results for the main text:

```
res = summary(bm)$p.table
res = cbind(res,Factor=10^(res[,"Estimate"]))
# Exponentiating the coefficient to get multiplicative factor
print.model.summary(res[2,5],res[2,3],res[2,4],units="x",effect.word="factor")
```

```
## [1] "factor = 3.4x, t = 9.34, P < 0.0001"
```

No evidence of any deviation; all points within the bounds of the simulated datasets.

```
qq.gam(bm,rep=1000,pch=1,level=1)
```

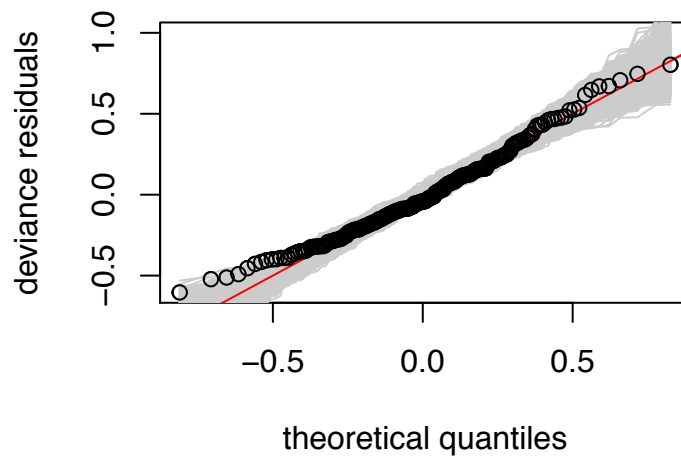

No evidence of any deviation or structure.

```
plot.lme(bm,type=c("p","smooth"),col.line="black")
```

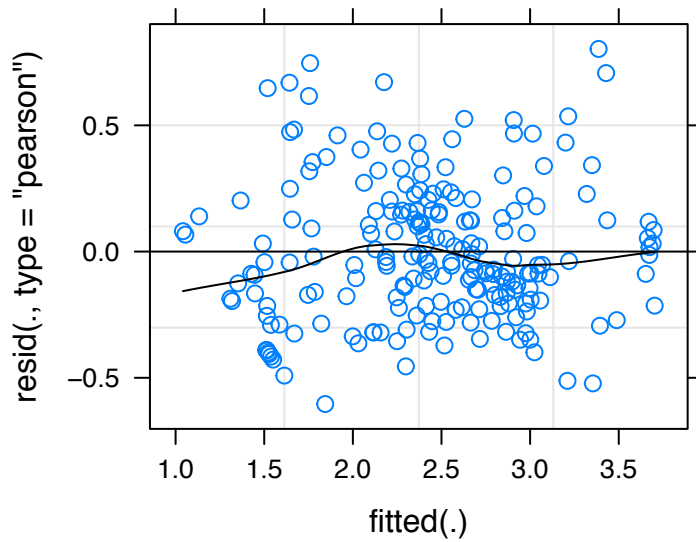

No autocorrelation of residuals.

```
acf(resid(bm))
```

### Series resid(bm)

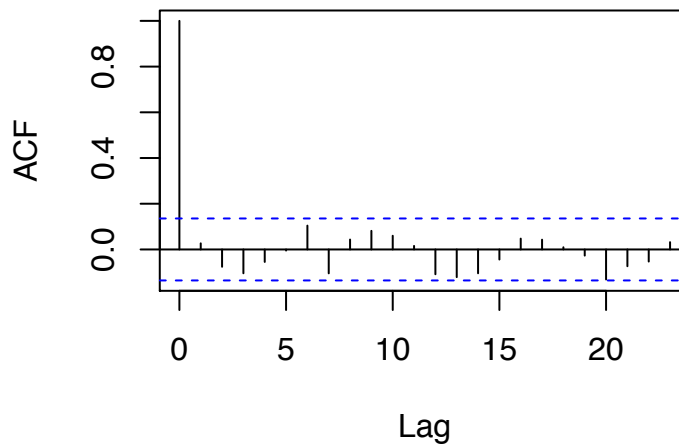

### 1.5° elevation angle

```
n.birds.e2.model = stationary.radar.model.light("logst(n.birds.cyl.e2)", dt2, elev="e2")
```

```
##           df      AIC
## mod.light.year 26.01437 275.0162
## mod.interact  29.86173 275.4296
## mod.light     20.52622 283.4821
```

```
bm = n.birds.e2.model
```

The best model includes *light* and *year* but not their interaction.

```
summary(bm)
```

```
##
```

```

## Family: gaussian
## Link function: identity
##
## Formula:
## eval(parse(text = response.name)) ~ eval(LIGHT) + year + s(as.numeric(eval(TIME)),
##   by = year) + s(eval(BIRD_DENSITY), by = year)
##
## Parametric coefficients:
##           Estimate Std. Error t value Pr(>|t|)
## (Intercept) -8583.0276  2640.8272  -3.250 0.001367 **
## eval(LIGHT)1    0.2875    0.0823   3.493 0.000595 ***
## year2012      5897.7775  2897.5004   2.035 0.043207 *
## year2013      8598.2387  2802.0783   3.069 0.002469 **
## year2015      6196.6699  2802.1699   2.211 0.028215 *
## year2016      8943.6367  3350.9547   2.669 0.008273 **
## ---
## Signif. codes:  0 '***' 0.001 '**' 0.01 '*' 0.05 '.' 0.1 ' ' 1
##
## Approximate significance of smooth terms:
##           edf Ref.df      F p-value
## s(as.numeric(eval(TIME))):year2010 0.9999  1.000 10.563 0.001362 **
## s(as.numeric(eval(TIME))):year2012 1.0000  1.000  5.035 0.025978 *
## s(as.numeric(eval(TIME))):year2013 1.0000  1.000  0.000 0.999937
## s(as.numeric(eval(TIME))):year2015 1.0000  1.000  6.445 0.011917 *
## s(as.numeric(eval(TIME))):year2016 1.0000  1.000  0.031 0.860547
## s(eval(BIRD_DENSITY)):year2010     7.4971  8.390  2.987 0.003818 **
## s(eval(BIRD_DENSITY)):year2012     1.0000  1.000  0.257 0.612484
## s(eval(BIRD_DENSITY)):year2013     1.3293  1.550  1.468 0.168807
## s(eval(BIRD_DENSITY)):year2015     3.1880  3.898  6.019 0.000165 ***
## s(eval(BIRD_DENSITY)):year2016     1.0000  1.000  0.163 0.686857
## ---
## Signif. codes:  0 '***' 0.001 '**' 0.01 '*' 0.05 '.' 0.1 ' ' 1
##
## R-sq.(adj) = 0.728  Deviance explained = 75.8%
## GCV = 0.21414  Scale est. = 0.18899  n = 213

```

Results for the main text:

```

res = summary(bm)$p.table
res = cbind(res,Factor=10^(res[,"Estimate"]))
# Exponentiating the coefficient to get multiplicative factor
print.model.summary(res[2,5],res[2,3],res[2,4],units="x",effect.word="factor")

```

```
## [1] "factor = 1.9x, t = 3.49, P = 0.0006"
```

Some deviation from the normal line, but all points within the bounds of the simulated datasets, or very close.

```
qq.gam(bm,rep=1000,pch=1,level=1)
```

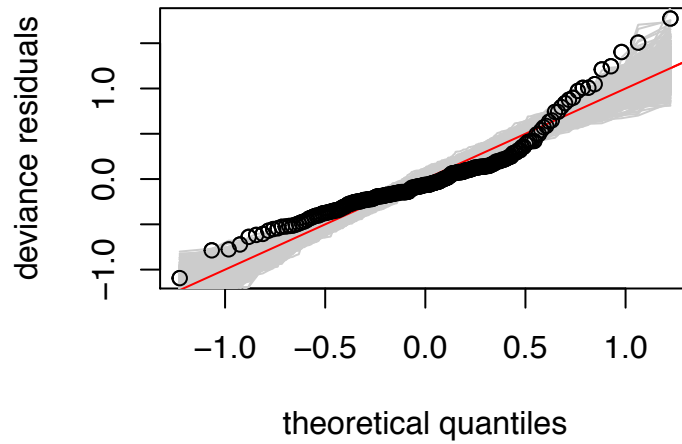

Some structure due to the large number of near-zero values in the dataset.

```
plot.lme(bm, type=c("p", "smooth"), col.line="black")
```

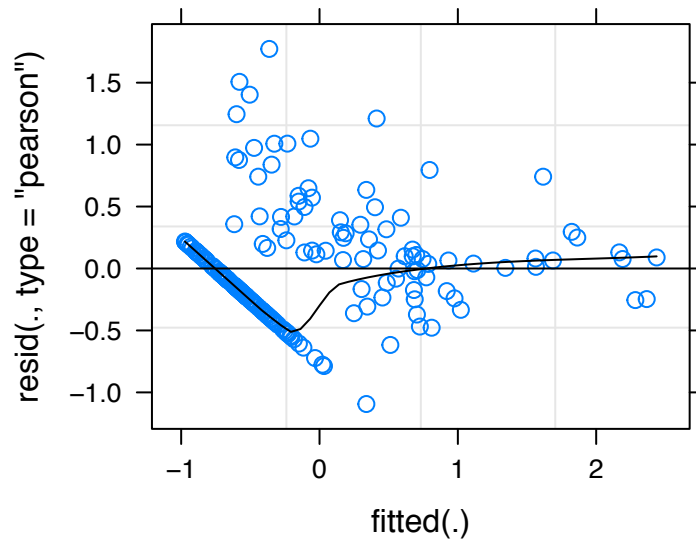

Negligible autocorrelation of residuals.

```
acf(resid(bm))
```

### Series resid(bm)

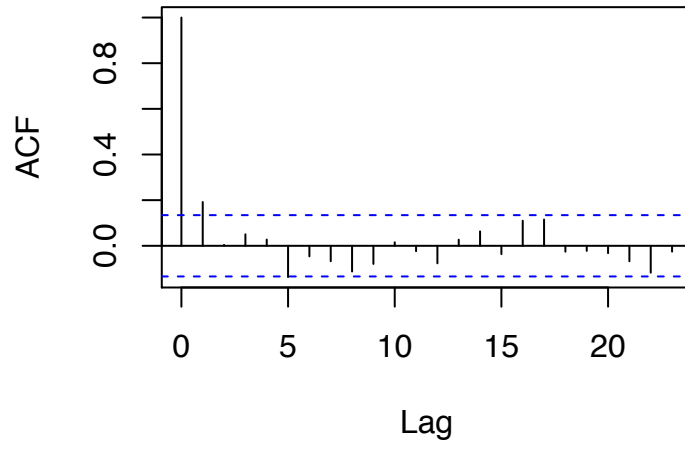

## Standardized peak density

As previous section, but for standardized peak density.

### 0.5° elevation angle

```
peak.std.e1.model = stationary.radar.model.light("logst(peak.std.e1)",dt1,elev="e1")
```

```
##           df      AIC
## mod.interact 25.88700 369.4469
## mod.light    19.87233 375.6902
## mod.light.year 22.19399 378.8855
```

```
bm = peak.std.e1.model
```

Best model includes *light* × *year* interaction.

```
summary(bm)
```

```
##
## Family: gaussian
## Link function: identity
##
## Formula:
## eval(parse(text = response.name)) ~ eval(LIGHT) * year + s(as.numeric(eval(TIME)),
##   by = year) + s(eval(BIRD_DENSITY), by = year)
##
## Parametric coefficients:
##           Estimate Std. Error t value Pr(>|t|)
## (Intercept) -1.146e+04  5.042e+03  -2.273  0.02419 *
## eval(LIGHT)1  8.075e-01  2.168e-01   3.724  0.00026 ***
## year2012     1.077e+04  5.160e+03   2.088  0.03818 *
## year2013     1.142e+04  5.166e+03   2.210  0.02836 *
## year2015     1.044e+04  5.070e+03   2.059  0.04093 *
## year2016     4.154e+03  8.692e+03   0.478  0.63329
## eval(LIGHT)1:year2012  4.105e-01  4.072e-01   1.008  0.31468
## eval(LIGHT)1:year2013 -1.998e-01  3.146e-01  -0.635  0.52623
## eval(LIGHT)1:year2015  8.522e-01  2.929e-01   2.910  0.00406 **
## eval(LIGHT)1:year2016 -1.305e-01  3.485e-01  -0.374  0.70858
## ---
## Signif. codes:  0 '***' 0.001 '**' 0.01 '*' 0.05 '.' 0.1 ' ' 1
##
## Approximate significance of smooth terms:
##           edf Ref.df      F p-value
## s(as.numeric(eval(TIME))):year2010 1.000  1.000  5.166  0.0242 *
## s(as.numeric(eval(TIME))):year2012 1.000  1.000  0.386  0.5351
## s(as.numeric(eval(TIME))):year2013 1.000  1.000  0.001  0.9757
## s(as.numeric(eval(TIME))):year2015 1.000  1.000  3.702  0.0559 .
## s(as.numeric(eval(TIME))):year2016 1.000  1.000  1.064  0.3035
## s(eval(BIRD_DENSITY)):year2010     4.175  5.107  2.813  0.0129 *
## s(eval(BIRD_DENSITY)):year2012     1.000  1.000  0.289  0.5917
## s(eval(BIRD_DENSITY)):year2013     1.540  1.790  2.358  0.1221
## s(eval(BIRD_DENSITY)):year2015     1.383  1.667  3.197  0.0661 .
## s(eval(BIRD_DENSITY)):year2016     1.788  2.153  1.120  0.4872
```

```
## ---
## Signif. codes:  0 '***' 0.001 '**' 0.01 '*' 0.05 '.' 0.1 ' ' 1
##
## R-sq.(adj) =  0.453   Deviance explained = 51.6%
## GCV = 0.34495   Scale est. = 0.30388   n = 209
```

Results for main text:

```
res = summary(bm)$p.table
res = cbind(res,Factor=10^(res[,"Estimate"]))
# Exponentiating the coefficients to get multiplicative factor
print.model.summary(res[2,5],res[2,3],res[2,4],units="x",effect.word="factor")
```

```
## [1] "factor = 6.4x, t = 3.72, P = 0.0003"
```

```
# Interaction
```

```
print.model.summary(10^(res[9,1]+res[2,1]),res[9,3],res[9,4],units="x",effect.word="factor")
```

```
## [1] "factor = 46x, t = 2.91, P = 0.0041"
```

No evidence of any deviation; all points within the bounds of the simulated datasets.

```
qq.gam(bm,rep=1000,pch=1,level=1)
```

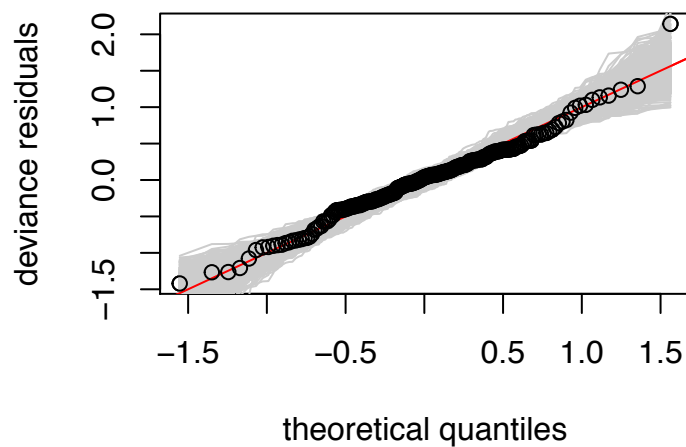

No evidence of any deviation or structure.

```
plot.lme(bm,type=c("p","smooth"),col.line="black")
```



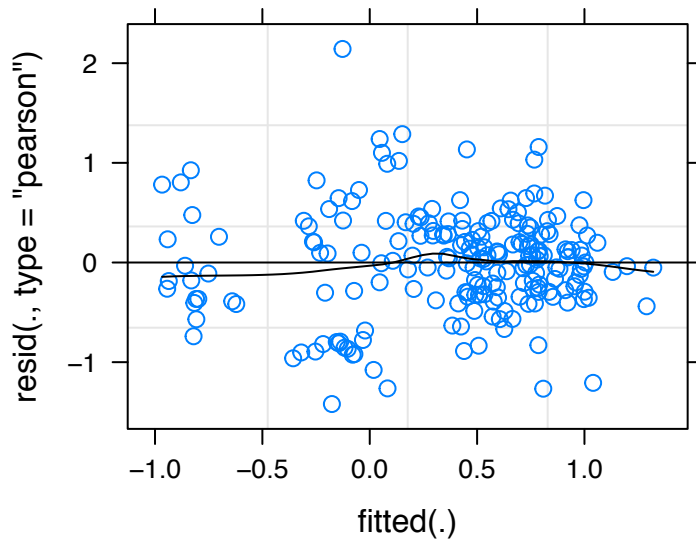

Negligible autocorrelation of residuals.

```
acf(resid(bm))
```

### Series resid(bm)

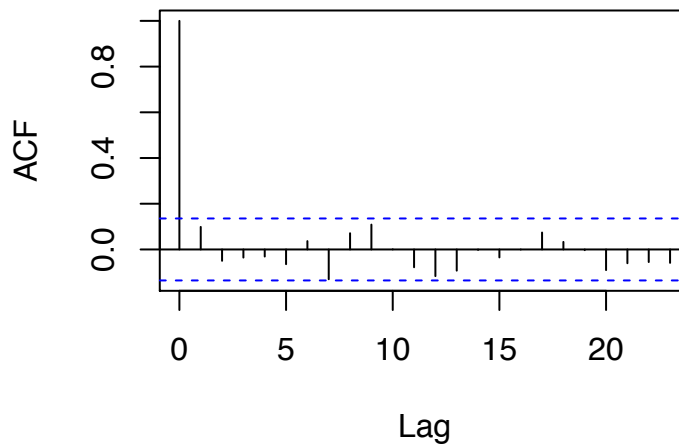

### 1.5° elevation angle

```
peak.std.e2.model = stationary.radar.model.light("logst(peak.std.e2)", dt2, elev="e2")
```

```
##           df      AIC
## mod.light.year 20.35718 523.5451
## mod.interact  24.43069 524.0113
## mod.light     16.56379 525.4860
```

```
bm = peak.std.e2.model
```

The best model includes *light* and *year*, but not their interaction.

```
summary(bm)
```

```
##
```

```

## Family: gaussian
## Link function: identity
##
## Formula:
## eval(parse(text = response.name)) ~ eval(LIGHT) + year + s(as.numeric(eval(TIME)),
##   by = year) + s(eval(BIRD_DENSITY), by = year)
##
## Parametric coefficients:
##           Estimate Std. Error t value Pr(>|t|)
## (Intercept) -9104.3033  3624.2956  -2.512  0.0128 *
## eval(LIGHT)1    0.6030    0.1508   3.997 9.17e-05 ***
## year2012      3548.9179  4249.1148   0.835  0.4046
## year2013      9179.5991  4062.8409   2.259  0.0250 *
## year2015      6153.2760  3960.3706   1.554  0.1219
## year2016      7001.7664  5347.7746   1.309  0.1920
## ---
## Signif. codes:  0 '***' 0.001 '**' 0.01 '*' 0.05 '.' 0.1 ' ' 1
##
## Approximate significance of smooth terms:
##           edf Ref.df    F p-value
## s(as.numeric(eval(TIME))):year2010 1.000  1.000 6.287 0.0128 *
## s(as.numeric(eval(TIME))):year2012 1.000  1.000 6.248 0.0133 *
## s(as.numeric(eval(TIME))):year2013 1.000  1.000 0.000 0.9982
## s(as.numeric(eval(TIME))):year2015 1.000  1.000 3.408 0.0664 .
## s(as.numeric(eval(TIME))):year2016 1.000  1.000 0.286 0.5932
## s(eval(BIRD_DENSITY)):year2010     1.873  2.358 1.040 0.3603
## s(eval(BIRD_DENSITY)):year2012     1.000  1.000 1.462 0.2281
## s(eval(BIRD_DENSITY)):year2013     1.790  1.956 0.313 0.6989
## s(eval(BIRD_DENSITY)):year2015     2.573  3.188 2.310 0.0881 .
## s(eval(BIRD_DENSITY)):year2016     1.122  1.231 0.080 0.7182
## ---
## Signif. codes:  0 '***' 0.001 '**' 0.01 '*' 0.05 '.' 0.1 ' ' 1
##
## R-sq.(adj) = 0.291  Deviance explained = 35.4%
## GCV = 0.71656  Scale est. = 0.65019  n = 209

```

Results for the main text:

```

res = summary(bm)$p.table
res = cbind(res,Factor=10^(res[, "Estimate"]))
# Effect of light after exponentiating the coefficient to get multiplicative factor
print.model.summary(res[2,5],res[2,3],res[2,4],units="x",effect.word="factor")

```

```
## [1] "factor = 4x, t = 4.00, P < 0.0001"
```

Some deviation from the normal line, but all points are either within the bounds of the simulated datasets or very close.

```
qq.gam(bm,rep=1000,pch=1,level=1)
```

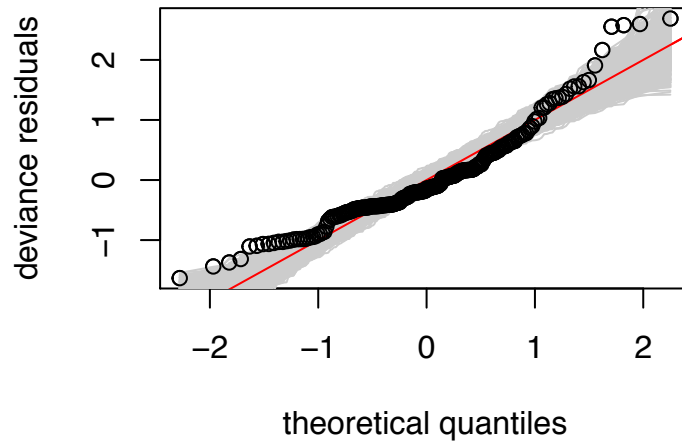

Appears to be some structure (likely due to large numbers of near-zero values), but not dramatic.

```
plot.lme(bm, type=c("p", "smooth"), col.line="black")
```

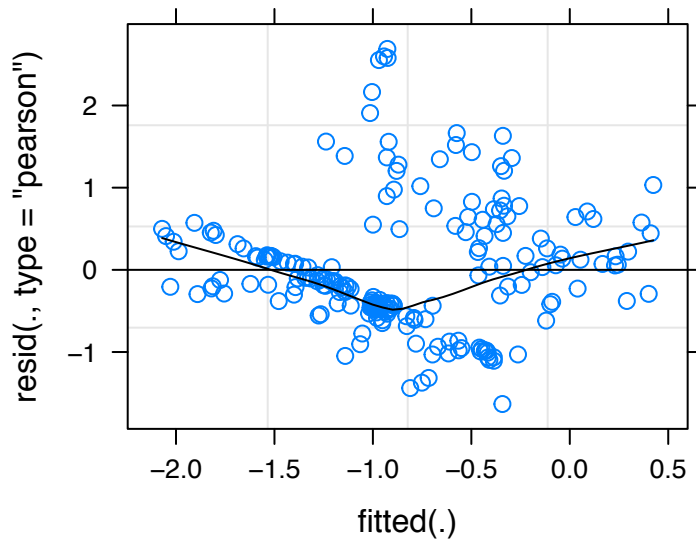

Negligible autocorrelation of residuals.

```
acf(resid(bm))
```

### Series resid(bm)

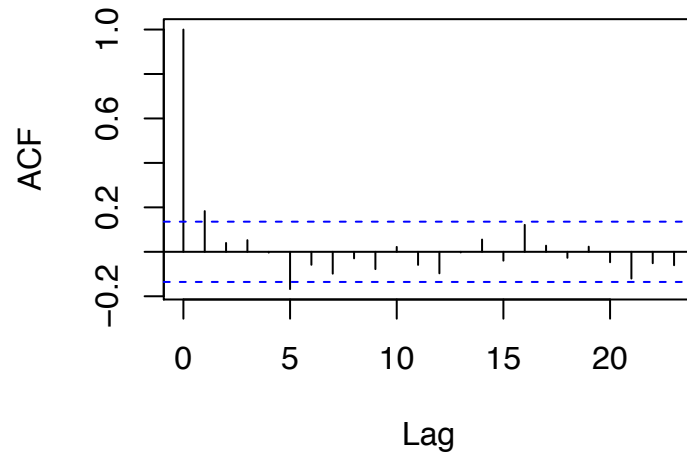

## Radial velocity

Note that radial velocity data have *not* been log-transformed.

### 0.5° elevation angle

```
velocity.e1.model = stationary.radar.model.light("velocity.cyl.e1",dt1,elev="e1")
```

```
##           df      AIC
## mod.interact 29.28329 814.1776
## mod.light.year 25.70874 817.0279
## mod.light    23.24699 819.2017
```

```
bm = velocity.e1.model
```

The best model includes the *light*  $\times$  *year* interaction term.

```
summary(bm)
```

```
##
## Family: gaussian
## Link function: identity
##
## Formula:
## eval(parse(text = response.name)) ~ eval(LIGHT) * year + s(as.numeric(eval(TIME)),
##   by = year) + s(eval(BIRD_DENSITY), by = year)
##
## Parametric coefficients:
##           Estimate Std. Error t value Pr(>|t|)
## (Intercept)      5.221e+04  2.260e+04   2.310  0.0221 *
## eval(LIGHT)1     -1.670e+00  7.951e-01  -2.101  0.0372 *
## year2012         -5.063e+04  2.314e+04  -2.188  0.0301 *
## year2013         -5.197e+04  2.286e+04  -2.274  0.0243 *
## year2015         -4.947e+04  2.287e+04  -2.163  0.0320 *
## year2016        -9.960e+03  3.079e+04  -0.323  0.7468
## eval(LIGHT)1:year2012 -3.714e+00  1.558e+00  -2.384  0.0183 *
## eval(LIGHT)1:year2013 -1.773e+00  1.496e+00  -1.185  0.2376
## eval(LIGHT)1:year2015 -2.678e+00  1.062e+00  -2.521  0.0127 *
## eval(LIGHT)1:year2016 -5.909e-01  1.223e+00  -0.483  0.6296
## ---
## Signif. codes:  0 '***' 0.001 '**' 0.01 '*' 0.05 '.' 0.1 ' ' 1
##
## Approximate significance of smooth terms:
##           edf Ref.df      F p-value
## s(as.numeric(eval(TIME))):year2010 1.000  1.000  5.337 0.02212 *
## s(as.numeric(eval(TIME))):year2012 1.000  1.000  0.012 0.91154
## s(as.numeric(eval(TIME))):year2013 1.000  1.000  0.013 0.91010
## s(as.numeric(eval(TIME))):year2015 1.000  1.000  0.600 0.44006
## s(as.numeric(eval(TIME))):year2016 1.000  1.000  4.078 0.04511 *
## s(eval(BIRD_DENSITY)):year2010      3.358  4.210  4.221 0.00181 **
## s(eval(BIRD_DENSITY)):year2012      2.853  2.986  3.346 0.02230 *
## s(eval(BIRD_DENSITY)):year2013      1.769  1.951  0.475 0.64828
## s(eval(BIRD_DENSITY)):year2015      4.303  5.233  3.661 0.00322 **
## s(eval(BIRD_DENSITY)):year2016      1.000  1.000  0.493 0.48343
```

```
## ---
## Signif. codes:  0 '***' 0.001 '**' 0.01 '*' 0.05 '.' 0.1 ' ' 1
##
## R-sq.(adj) =  0.601   Deviance explained = 65.9%
## GCV = 4.4118   Scale est. = 3.7515     n = 189
```

Results for main text:

```
res = summary(bm)$p.table
print.model.summary(res[2,1],res[2,3],res[2,4],units="m/s",effect.word="effect")
```

```
## [1] "effect = -1.7 m/s, t = -2.10, P = 0.0372"
```

```
# Interaction - 2012
```

```
print.model.summary(res[7,1]+res[2,1],res[7,3],res[7,4],units="m/s",
                    effect.word="effect with interaction")
```

```
## [1] "effect with interaction = -5.4 m/s, t = -2.38, P = 0.0183"
```

```
# Interaction - 2015
```

```
print.model.summary(res[9,1]+res[2,1],res[9,3],res[9,4],units="m/s",
                    effect.word="effect with interaction")
```

```
## [1] "effect with interaction = -4.3 m/s, t = -2.52, P = 0.0127"
```

No strong evidence of any deviation; all points within the bounds of the simulated datasets.

```
qq.gam(bm,rep=1000,pch=1,level=1)
```

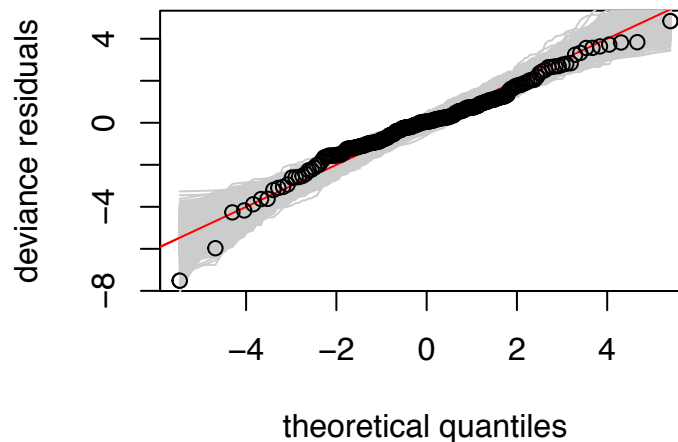

No evidence of any deviation or structure.

```
plot.lme(bm,type=c("p","smooth"),col.line="black")
```

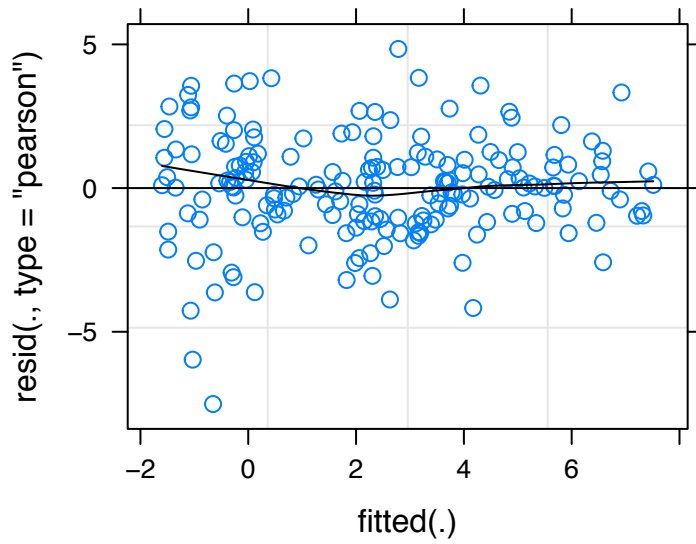

Negligible autocorrelation of residuals.

```
acf(resid(bm))
```

### Series resid(bm)

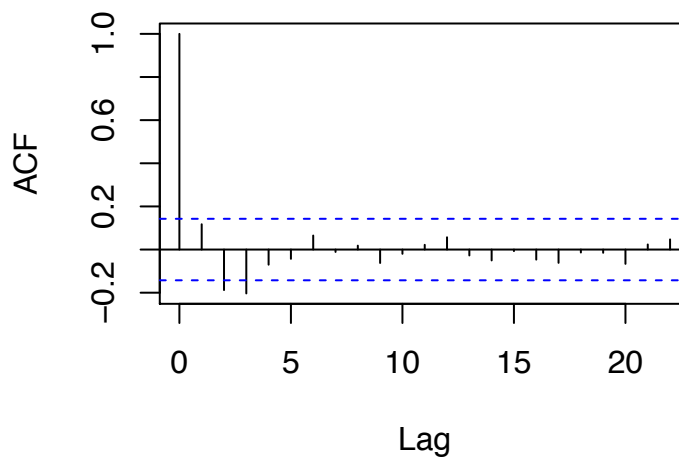

## Number of flight calls

```
response.name="logst(n.calls)"
elev="e1"
```

```
aic = AIC(mod.interact,
          mod.light.year,
          mod.light); aic
```

```
##              df      AIC
## mod.interact  26.22691 -364.0446
## mod.light.year 22.57075 -276.7783
## mod.light     22.52872 -276.8101
```

```
calls.e1.model = eval(parse(text=rownames(aic)[which.min(aic$AIC)]))
bm = calls.e1.model
```

The best model includes the *light*  $\times$  *year* interaction term.

```
summary(bm)
```

```
##
## Family: gaussian
## Link function: identity
##
## Formula:
## eval(parse(text = response.name)) ~ eval(LIGHT) * year + max_eta.e1 +
##   s(as.numeric(eval(TIME)), by = year) + s(eval(BIRD_DENSITY),
##     by = year)
##
## Parametric coefficients:
##              Estimate Std. Error t value Pr(>|t|)
## (Intercept)  -2.342e+01  2.880e+00  -8.134  1.38e-13 ***
## eval(LIGHT)1    1.519e-01  3.356e-02   4.527  1.20e-05 ***
## year2013       7.632e+00  3.756e+00   2.032  0.04390 *
## year2015      -5.346e+01  5.492e+00  -9.733 < 2e-16 ***
## year2016       9.635e+00  3.070e+00   3.138  0.00204 **
## max_eta.e1     4.233e-07  1.427e-06   0.297  0.76706
## eval(LIGHT)1:year2013 -1.087e-01  4.737e-02  -2.296  0.02306 *
## eval(LIGHT)1:year2015  3.107e-01  4.517e-02   6.877  1.49e-10 ***
## eval(LIGHT)1:year2016 -9.658e-02  5.088e-02  -1.898  0.05957 .
## ---
## Signif. codes:  0 '***' 0.001 '**' 0.01 '*' 0.05 '.' 0.1 ' ' 1
##
## Approximate significance of smooth terms:
##              edf Ref.df      F p-value
## s(as.numeric(eval(TIME))):year2010  0.8308  0.8309 99.157 < 2e-16 ***
## s(as.numeric(eval(TIME))):year2013  1.0912  1.2291 35.199 0.001458 **
## s(as.numeric(eval(TIME))):year2015  1.5598  1.5603 69.656 < 2e-16 ***
## s(as.numeric(eval(TIME))):year2016  0.5385  0.5388 23.884 0.000447 ***
## s(eval(BIRD_DENSITY)):year2010      6.2036  7.0849  7.762 2.59e-08 ***
## s(eval(BIRD_DENSITY)):year2013      1.0000  1.0000  0.638 0.425828
## s(eval(BIRD_DENSITY)):year2015      6.0761  7.0266 17.366 < 2e-16 ***
## s(eval(BIRD_DENSITY)):year2016      1.1145  1.2185  0.129 0.629785
## ---
```



```
## Signif. codes:  0 '***' 0.001 '**' 0.01 '*' 0.05 '.' 0.1 ' ' 1
##
## Rank: 65/81
## R-sq.(adj) =  0.949   Deviance explained = 95.6%
## GCV = 0.0075709   Scale est. = 0.0064918   n = 177
```

Results for the main text:

```
res = summary(bm)$p.table
res = cbind(res,Factor=10^(res[,"Estimate"]))
# Effect of light after exponentiating the coefficient to get multiplicative factor
print.model.summary(res[2,5],res[2,3],res[2,4],units="x",effect.word="factor")
```

```
## [1] "factor = 1.4x, t = 4.53, P < 0.0001"
```

```
# Interaction - 2013
```

```
print.model.summary(10^(res[7,1]+res[2,1]),res[7,3],res[7,4],units="x",
                    effect.word="factor with interaction")
```

```
## [1] "factor with interaction = 1.1x, t = -2.30, P = 0.0231"
```

```
# Interaction - 2015
```

```
print.model.summary(10^(res[8,1]+res[2,1]),res[8,3],res[8,4],units="x",
                    effect.word="factor with interaction")
```

```
## [1] "factor with interaction = 2.9x, t = 6.88, P < 0.0001"
```

No strong evidence of any deviation; all points within the bounds of the simulated datasets.

```
qq.gam(bm,rep=1000,pch=1,level=1)
```

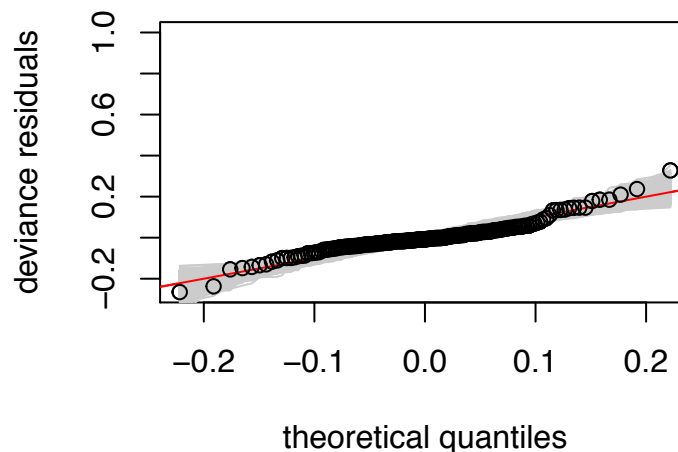

Although the variance increases, this does not affect the regression coefficients; it may make the test more conservative (i.e. more difficult to detect a statistical difference between illuminated and dark periods or between years).

```
plot.lme(bm,type=c("p","smooth"),col.line="black")
```

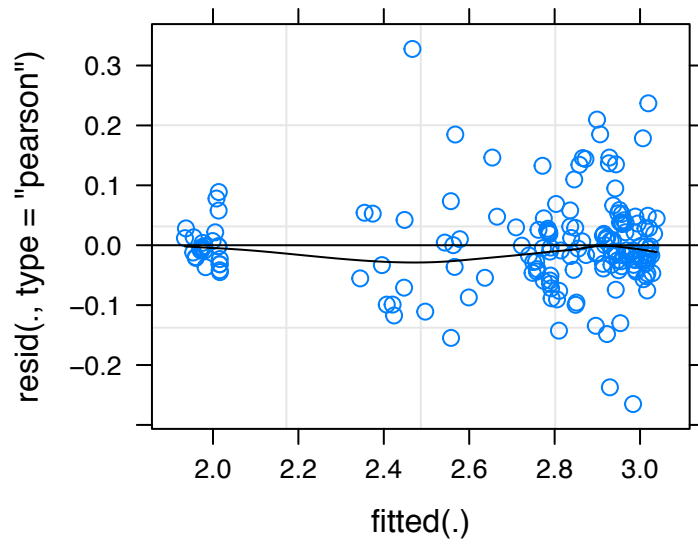

Negligible autocorrelation of residuals.

```
acf(resid(bm))
```

### Series resid(bm)

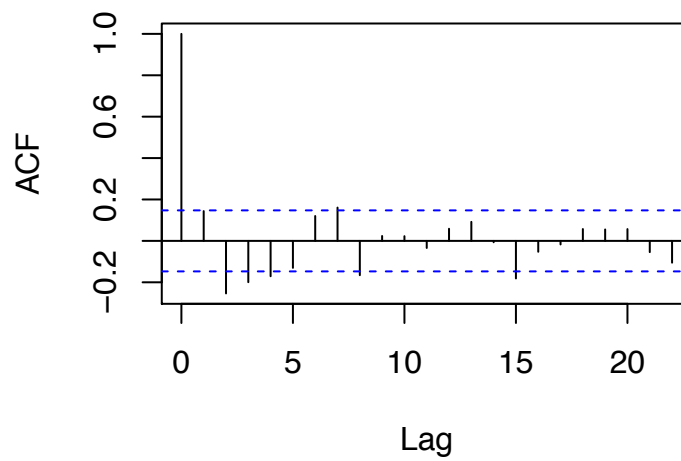

## Number of birds affected by the lights

Here we estimate the total number of birds affected by the lights. Our best estimate of turnover time comes from the simulations, where the stabilization time is 34 minutes. Since on average there should be complete turnover within that period of time, we use 34 minutes as our best estimate of the turnover time. Then we find the median time between radar scans in minutes

```
time.between.scans = as.numeric(median(diff(data.m$sweep.time.e1))); time.between.scans
```

```
## [1] 9.466667
```

Next we divide the time between scans by the turnover time to find the proportion of samples that can be treated as ‘independent.’ We will therefore calculate total numbers of birds only from a subset of the dataset of this size.

```
retain.proportion = time.between.scans/34; retain.proportion
```

```
## [1] 0.2784314
```

To accomplish this, we subsample the dataset 10000 times with the probability of keeping a data point equal to ‘retain.proportion.’

```
set.seed(123)
yrs = sort(unique(data.m$year))
n.sim = 1e4
res.array = array(dim=c(n.sim,length(yrs)))
# xx = rep(NA,n.sim)
for (i in 1:n.sim) {
  res.array[i,] = with(data.m[sample.int(nrow(data.m),size=nrow(data.m)*retain.proportion),],
    tapply(n.birds.difference.5k.e1,year,sum,na.rm=T)) # %>% sum
}
colnames(res.array) = levels(data.m$year)
```

We take the mean value of these 10000 iterations as our best estimate of number of the total number of birds affected by the lights during the study period, rounded to nearest hundred thousand.

```
# All years combined
apply(res.array,2,mean) %>% sum %>% round(-5)
```

```
## [1] 1100000
```

```
# Breakdown by year
apply(res.array,2,mean) %>% round(-3)
```

```
## 2008 2010 2012 2013 2014 2015 2016
## 21000 669000 29000 198000 5000 130000 34000
```

```
# Mean year
apply(res.array,2,mean) %>% mean %>% round(-4)
```

```
## [1] 160000
```

```
# Standard deviation
apply(res.array,2,mean) %>% sd %>% round(-4)
```

```
## [1] 240000
```

```
# Median year
apply(res.array,2,mean) %>% median %>% round(-4)
```

```
## [1] 30000
```

Finally, we calculate a 95% confidence interval for this estimate by finding the 0.025 and 0.975 quantiles of the 10000 iterations.

```
# All years combined  
round(quantile(apply(res.array,1,sum),probs=c(.025,.975)),-5)
```

```
##      2.5%   97.5%  
## 600000 1600000
```

```
# By year  
apply(res.array,2,quantile,probs=c(.025,.975)) %>% round(-3)
```

```
##           2008    2010    2012    2013    2014    2015    2016  
## 2.5%      9000  217000  13000  110000      0    47000  15000  
## 97.5%    34000  1178000  47000  298000  12000  229000  55000
```
